1 **Distinct transcriptional programs of SOX2 in different types of small cell lung cancers**

2

3 **Running title**

4 Distinct role of SOX2 in lung cancer.

5

6 **Authors**

7 Yuki Tenjin<sup>1, 2</sup>, Kumi Matsuura<sup>3</sup>, Shinji Kudoh<sup>1</sup>, Shingo Usuki<sup>4</sup>, Tatsuya Yamada<sup>1, 5</sup>, Akira

8 Matsuo<sup>1</sup>, Younosuke Sato<sup>1</sup>, Haruki Saito<sup>1, 6</sup>, Kosuke Fujino<sup>1, 5</sup>, Joeji Wakimoto<sup>7</sup>, Takaya

9 Ichimura<sup>8</sup>, Hirotsugu Kohrogi<sup>9</sup>, Takuro Sakagami<sup>2</sup>, Hitoshi Niwa<sup>3</sup>, Takaaki Ito<sup>1</sup>

10

11 **Affiliations**

12 Departments of <sup>1</sup>Pathology and Experimental Medicine, <sup>2</sup>Respiratory Medicine, <sup>5</sup>Thoracic

13 Surgery, and <sup>6</sup>Otolaryngology-Head and Neck Surgery, Kumamoto University, Graduate

14 School of Medical Science Kumamoto University, Graduate School of Medical Science, Honjo

15 1-1-1, Chuo-ku, Kumamoto 860-8556, Japan.

16 <sup>3</sup>Department of Pluripotent Stem Cell Biology, <sup>4</sup>Liaison Laboratory Research Promotion

17 Center (LILA), Institute of Molecular Embryology and Genetics, Kumamoto University,

18 Honjo 2-2-1, Chuo-ku, Kumamoto 860-0811, Japan.

19 <sup>7</sup>Division of Pathology, Minami Kyushu National Hospital, Kagoshima, 899-5293, Japan.

20 <sup>8</sup>Department of Pathology, Saitama Medical University Faculty of Medicine, Saitama

21 350-0495, Japan.

22 <sup>9</sup>Department of Respiratory Medicine, Omuta Tenryo Hospital, Tenryo 1-100, Omuta,

23 Fukuoka 836-8556, Japan.

24

25 **Abstract**

26 *SOX2* is an oncogene in human small cell lung cancer (SCLC), an aggressive  
27 neuroendocrine (NE) tumor. However, the roles of SOX2 in SCLC remain unclear, and  
28 strategies to selectively target SOX2 in SCLC cells have not yet been established. We herein  
29 demonstrated that SOX2 is involved in NE differentiation and tumorigenesis in cooperation  
30 with ASCL1, a lineage-specific transcriptional factor, in the classical subtype of SCLC cell  
31 lines. ASCL1 recruits SOX2, which promotes INSM1 expression. Precursor SCLC lesions  
32 were established in *Trp53*<sup>(-/-)</sup>; *CCSP*<sup>rtTA</sup>; *tetO* *Cre*; *floxedRb1*; *floxedHes1* mice, and the NE  
33 neoplasms induced were positive for *Ascl1*, *Sox2*, and *Insm1*. In contrast to the ASCL1-SOX2  
34 signaling axis to control the SCLC phenotype in classical subtype SCLC, SOX2 targeted  
35 distinct genes, such as those related to the Hippo pathway, in ASCL1-negative, variant  
36 subtype SCLC. The present results support the importance of the ASCL1-SOX2 axis as a  
37 main subtype of SCLC, and suggest the therapeutic potential of targeting the ASCL1-SOX2  
38 signaling axis and the clinical utility of SOX2 as a biological marker in the classical subtype  
39 of SCLC.

40

41 **Keywords**

42 ASCL1; classical subtype; variant subtype Small cell lung carcinoma; SOX2

43

44 **Introduction**

45 Lung cancer is the leading cause of cancer-related mortality worldwide. Small cell  
46 lung cancer (SCLC) accounts for approximately 14% of all lung cancers and is genetically  
47 considered to be one of the most aggressive malignant neuroendocrine (NE) tumors (Byers *et*  
48 *al.*, 2015). Despite high response rates to first-line treatment, SCLC cases show rapid  
49 growth and metastasis and acquire multidrug resistance. The median survival of patients  
50 with SCLC is 7 months, and this has not markedly changed in the last few decades (Wang *et*  
51 *al.*, 2017). The development of novel target molecules in therapies for SCLC remains limited.  
52 The findings of basic studies on the molecular mechanisms underlying small cell  
53 carcinogenesis have yet to be clarified, and advances in novel therapeutic development are  
54 expected (Gazdar *et al.*, 2017).

55 The World Health Organization (WHO) Classification recognizes SCLC as a relatively  
56 homogeneous tumor, with pure SCLC and combined SCLC subtypes (Travis *et al.*, 2015).  
57 Approximately 30 years ago, Gazdar *et al.* reported the different forms of the “classic” and  
58 “variant” subtypes of SCLC. Classical SCLC cells are characterized by floating cell growth  
59 and distinct NE differentiation, and variant SCLC cells by adhesive growth and poor NE  
60 differentiation (Gazdar *et al.*, 1985; Carney *et al.*, 1985). Classical cell lines belong to NE

61 high SCLC, which may be associated with the increased expression of Achaete-Scute  
62 complex homologue 1 (ASCL1), a member of the basic helix-loop-helix (bHLH) family of  
63 transcription factors. On the other hand, the variant cell lines belong to NE low SCLC,  
64 which is associated with the activation of *NOTCH*, *Hippo*, and *RE-1 silencing transcription*  
65 *factor (REST)* genes and prominent epithelial-to-mesenchymal (EMT) transition resulting in  
66 a mesenchymal phenotype (Lim JS *et al.*, 2017, Zhang *et al.*, 2018). ASCL1 was previously  
67 shown to be expressed at a high frequency in SCLC (Ball *et al.*, 1993). Furthermore, the  
68 knockdown of *ASCL1* induced growth inhibition and apoptosis in SCLC cell lines (Osada *et*  
69 *al.*, 2005, 2008). Insulinoma-associated protein 1 (INSM1) is a crucial regulator of NE  
70 differentiation in lung cancer, and is specifically expressed in SCLC, along with ASCL1  
71 (Fujino *et al.*, 2015). Borromeo *et al.* (2016) reported that Ascl1 played a pivotal role in  
72 tumorigenesis in mouse models of SCLC, and also suggested that *SOX2* and *INSM1* were  
73 target genes of ASCL1. In human SCLC, *SOX2* was recognized as an oncogene because  
74 *SOX2* amplification was detected in some SCLCs, and *SOX2* gene suppression inhibited the  
75 cell proliferative capacity of SCLC cell lines (Rudin *et al.*, 2012).

76 The major aim of the present study is to elucidate the mechanisms by which SOX2  
77 affects the phenotype and heterogeneity of SCLC. We hypothesized that SOX2 may  
78 contribute to distinct transcriptional programs and biological characteristics in both the

79 classical and variant subtypes of SCLC. To test this hypothesis, the present study was  
80 designed to investigate the following: (1) a comparison of the target genes of SOX2 in human  
81 SCLC cell lines by a chromatin immunoprecipitation sequence (ChIP-seq) analysis. (2) the  
82 relationship between ASCL1 and SOX2 in SCLC cell lines, surgically-resected tissues, and  
83 mouse SCLC precursor lesions, and (3) the functional difference in SOX2 between the  
84 classical and variant subtypes of human SCLC cell lines. We herein demonstrated that  
85 SOX2 was more strongly expressed in some SCLC than non-SCLC (NSCLC). SOX2  
86 regulates distinct transcriptional programs in both the classical and variant subtypes of  
87 SCLC, and, in the classical subtype, functions in an ASCL1-dependent manner.

88

## 89 **Results**

### 90 **SOX2 is overexpressed and targeted distinct genes between classical and variant subtypes** 91 **of SCLC cell lines**

92 To examine SOX2 expression patterns, we performed a Western blot (WB) analysis of  
93 12 lung cancer cell lines (7 SCLCs, 3 adenocarcinomas (ADCs), and 2 squamous cell  
94 carcinomas (SCCs)). The WB analysis revealed that the SOX2 protein was generally  
95 expressed at markedly higher levels in all SCLC cell lines examined than in the NSCLC cell  
96 lines. This result suggested that SOX2 plays a more pivotal role in SCLC cell lines. Four out

97 of the 7 SCLC cell lines simultaneously expressed SOX2, ASCL1, and INSM1 (Fig. 1A).

98 There are two subtypes of SCLC cell lines, classical and variant, which are distinguished by

99 their morphologies or NE properties. The loss of the expression of a master transcriptional

100 factor, such as ASCL1, is often associated with the properties of variant SCLC cell lines

101 (Zhang *et al.*, 2018). In the present study, H69, H889, SBC1, and H1688 belonged to the

102 classical subtype of SCLC cell lines, which were positive for ASCL1 and INSM1. In contrast,

103 H69AR, SBC3, and SBC5 were classified as the variant subtype of SCLC cell lines, which

104 were negative for ASCL1. We then conducted ChIP-seq to analyze SOX2 target genes in the

105 H69, H889, and SBC3 cell lines. We also combined the results of the RNA-seq analysis for

106 these cell lines, which showed the global expression levels of mRNAs. As shown in a Venn

107 plot, we identified 346 SOX2-bound genes (shared in NCI-H69 and NCI-H889) that were

108 specifically occupied in the classical subtypes and expressed at higher levels in the classical

109 subtypes than in the variant subtype (Fig. 1B). Some neuron-related genes, such as *INSM1*,

110 *SEZ6L*, or *SV2B*, were included as their common target genes. On the other hand, we

111 identified 825 SOX2-bound genes (targeted in SBC3) that were specifically occupied in the

112 variant subtype and expressed at higher levels in the variant subtype than in the classical

113 subtypes. Hippo pathway-related genes, such as *YAP1*, *WWTR1*, *LATS2*, and *REST*, which

114 were not contained in the classical subtypes, were identified in this category (Fig. 1B). To

115 validate functional differences in SOX2 between the classical and variant subtypes of SCLC,  
116 we used the Database for Annotation, Visualization and Integrated Discovery (DAVID)  
117 online bioinformatics tool for a GO functional analysis and extracted the top 10 enriched  
118 categories in biological processes. Neuron-related categories were more likely to be included  
119 in the classical subtype, and cell development- or movement process-related categories in  
120 the variant subtype (Fig. 1C). These results suggest that SOX2 regulates distinct  
121 transcriptional programs between the classical and variant subtypes of SCLC cell lines.

122

123 **ASCL1 is one of the driver molecules of SOX2 and recruits SOX2 for distinct transcriptional**  
124 **regulation in classical subtypes of SCLC**

125 To investigate the biological effects of ASCL1 on SOX2 in lung cancer cell lines, we  
126 performed *ASCL1* transfection experiments. An A549 cell line that stably expresses ASCL1  
127 was established, as previously reported (Ito *et al.*, 2017; Tenjin *et al.*, 2019). A549 is a  
128 representative ADC cell line that does not express ASCL1 or other NE markers. A549  
129 expressed SOX2 more weakly than the SCLC cell lines examined (Fig. 1A). We detected the  
130 up-regulated expression of SOX2 following the forced expression of ASCL1 in A549 cells. The  
131 expression of INSM1 and WNT11 was also induced (Fig. 2A). Immunohistochemical staining  
132 (IHC) revealed that SOX2 was more strongly expressed in xenotransplanted tumor cells



133 with the *ASCL1* transgene than in those from A549 mock cells (Fig. 2B). To show changes in  
134 transcriptional regulation driven by SOX2 in an ASCL1-dependent manner, we compared  
135 the target genes of SOX2 between *ASCL1*-transfected A549 and A549 mock cells. We  
136 combined the results of ChIP- and RNA-seq analyses for these cells and identified 35 genes  
137 that had specific SOX2-binding peaks and higher expression levels of mRNAs in  
138 *ASCL1*-transfected A549 cells than in mock cells (Fig. 2C). This result suggested that SOX2  
139 drives the distinct transcriptional regulation of SCLC. An integrated genome viewer (IGV)  
140 snapshot showed SOX2 binding at the overlap region of the transcription start site (TSS) of  
141 *INSM1* (Fig. 2D). To confirm that ASCL1 actually affects SOX2 expression in SCLCs, we  
142 conducted *ASCL1* knockdown experiments using RNA interference (RNAi) in H69, H889,  
143 and SBC1 cell lines as representatives of SCLC cells that simultaneously express ASCL1  
144 and SOX2. The knockdown of ASCL1 expression in these cells resulted in significant  
145 reductions in SOX2 in 2 out of the 3 cell lines, namely, H889 and SBC1 (Fig.2E).  
146 Furthermore, to examine SOX2, ASCL1, and INSM1 expression patterns, we IHC stained  
147 30 surgically resected SCLC tissues for these proteins as well as 20 surgically resected ADC  
148 and 20 surgically resected SCC tissues for SOX2 and ASCL1. IHC revealed that SCLCs and  
149 SCCs expressed SOX2 at slightly higher levels than ADCs: approximately 70.0% in SCLCs,  
150 55.0% in SCCs, and 35.0% in ADCs. In SCLC tissues, 60% of cases (18 out of 30 cases) were

151 doubly positive for *ASCL1* and *SOX2* and were also positive for *INSM1*. Although  
152 *SOX2*-positive, *ASCL1*-negative cases were detected (3 out of 30 cases), there were no  
153 *ASCL1*-positive, *SOX2*-negative cases (0 out of 30 cases). *INSM1* was strongly expressed in  
154 SCLC (25 out of 30 cases) and all *ASCL1*-positive cases simultaneously expressed *INSM1*  
155 (18 out of 18 cases) (Fig. 2F, Table 1, and Supplementary Fig. S1). Furthermore, based on  
156 the results showing that *SOX2*, *ASCL1*, and *INSM1* were more likely to be co-expressed in  
157 SCLC, we surveyed public datasets of gene expression profiling in human SCLC samples  
158 and examined their relationships. The RNA-seq dataset using tumor samples from 79 SCLC  
159 patients confirmed the coordinated expression of *ASCL1* and *SOX2* in human SCLC tissue  
160 samples (GSE60052:  $\rho=0.327759$ ,  $p=0.003168$ ). In the same manner, we confirmed the  
161 coordinated expression of *ASCL1* and *INSM1* (GSE60052:  $\rho=0.357944$ ,  $p=0.001188$ ).  
162 Heatmap data focusing on *SOX2*, *ASCL1*, and *INSM1* was obtained using the dataset  
163 reported by Jiang *et al.* (2016) (Fig. 2G). These results support the positive regulation of  
164 *SOX2* and *INSM1* expression by *ASCL1*.

165

166 **The role of Sox2 in the classical subtype of SCLC cell lines and the *ASCL1*-transfected A549**  
167 **cell line**

168 To investigate the biological significance of *SOX2* in the classical subtype of SCLC cell

169 lines and the *ASCL1*-transfected A549 cell line, we conducted *SOX2* knockdown experiments  
170 using RNAi on these cells. The knockdown of *SOX2* expression resulted in significant  
171 reductions in *ASCL1* (Supplementary Fig. S2) and *INSM1* expression (Fig. 3A) in the H69,  
172 H889, and SBC1 cell lines. Furthermore, the expression of *WNT11* and *CDH1* was reduced  
173 in the H69, H889, and SBC1 cell lines after the knockdown of *SOX2* (Fig. 3A). This result  
174 suggests that *SOX2* affected EMT in SCLC. The results of the *SOX2* knockdown experiment  
175 on *ASCL1*-transfected A549 cells were also shown. Not only *INSM1* and *WNT11*, but also  
176 *NOTCH1*, *MYC*, *TCF4*, *RBL1*, and *TP53* protein levels decreased after the knockdown of  
177 *SOX2*. The suppression of *SOX2* also affected the phosphorylation of histone H3 (p-HH3)  
178 protein levels (Fig. 3A). Cell counting assays revealed that the knockdown of *SOX2*  
179 suppressed cell growth in the H69, H889, and SBC1 cells lines (Fig. 3B). This result  
180 suggests that *SOX2* positively affected cell proliferation in the classical subtype of SCLC  
181 cells and regulated the expression of key molecules for the SCLC phenotype in the presence  
182 of *ASCL1*.

183

#### 184 **The role of *SOX2* in variant subtypes of SCLC cell lines.**

185 To investigate the role of *SOX2* in variant subtypes of SCLC cell lines, we conducted  
186 *SOX2* knockdown experiments using RNAi on SBC3 and H69AR cell lines. SBC3 and

187 H69AR are representative variant subtypes of the SCLC cell line that lack the expression of  
188 ASCL1 and INSM1. These cells have markedly fewer NE properties than the classical  
189 subtype of SCLC cell lines. The results obtained showed that the knockdown of *SOX2* did not  
190 significantly reduce tumor cell proliferative capacity in the SBC3 and H69AR cell lines. A  
191 quantitative real-time polymerase chain reaction (qRT-PCR) revealed that Hippo-related  
192 genes, such as *YAP1* or *TEAD1*, and *VIMENTIN* mRNA expression levels were significantly  
193 reduced after the knockdown of *SOX2*. On the other hand, the expression of *ASCL1*, *INSM1*,  
194 and *WNT11* was not significantly affected by the knockdown of *SOX2* in these cells (Fig. 4).  
195 These results suggest that SOX2 did not always sufficiently affect tumor proliferative  
196 capacity in SCLC and, in the variant subtype, it regulated the expression of downstream  
197 target genes that were distinct from those of the classical subtype of SCLC. We obtained  
198 similar results in the *SOX2* knockout experiments using the CRISPR/Cas9 system on the  
199 SBC3 and H69AR cell lines (Supplementary Fig. S3).

200

201 **Ascl1, Sox2, and Insm1 were simultaneously expressed in pulmonary NE tumors in the**  
202 **genetically engineered mouse model**

203 The ASCL1 highly-expressing subtype of classical SCLC represents the majority of  
204 SCLC based on multiple lines of evidence. ASCL1 is normally present in lung NE cells

205 during development, and HES1, one of the Notch signaling targets, suppresses the  
206 expression of ASCL1 and NE cell differentiation (Borges *et al.*, 1997; Ito *et al.*, 2000). Most of  
207 the classical SCLC cell lines and primary tumor samples were shown to strongly express  
208 ASCL1 (Rudin *et al.*, 2019). Close signaling contact with the Notch-Hes1 pathway and  
209 ASCL1 expression has been proposed to exist in small cell lung carcinogenesis (George *et al.*,  
210 2015). On the other hand, the *Trp53* and *Rb1* double-knockout mouse is fundamentally  
211 presented as a gene-engineered SCLC mouse model (Meuwissen *et al.*, 2003). In the present  
212 study, we established a *Trp53* -knockout and *Rb1* and *Hes1* double-conditional knockout  
213 mouse model, which aimed to add the effects of the inactivation of the Notch-Hes1 pathway  
214 to the fundamental SCLC mouse model. The results obtained revealed that multiple SCLC  
215 precursor lesions developed in the broncho-bronchiolar epithelium of the mouse and IHC  
216 showed that *Ascl1*, *Sox2*, and *Insm1* were positively expressed in these lesions (Fig. 5).  
217 Therefore, the inactivation of Notch signaling induced precursor lesions of the classical  
218 subtype of SCLC under *Trp53*-*Rb1*- gene-deficient conditions.

219

## 220 Discussion

221 *SOX2* is an oncogene in human SCLC and its amplification has been detected in some  
222 SCLCs. In the present study, we investigated the different functions of SOX2 and whether

223 ASCL1 was present in SCLC cell lines. SOX2 regulated INSM1 or WNT11 with the  
224 cooperation of ASCL1 in the classical subtype of SCLC. On the other hand, SOX2 targeted  
225 distinct genes, such as the Hippo pathway, in the variant subtype. These results suggest  
226 that *SOX2* is not only an oncogene in human SCLC, but may also drive distinct  
227 transcriptional regulation in each subtype of SCLC. Therefore, care is needed when  
228 considering SOX2 as a potential therapeutic target or biological marker in the diagnosis and  
229 treatment of SCLC.

230 We revealed that ASCL1 regulated SOX2 in the classical type of the SCLC cell line.  
231 Borromeo et al. (2016) showed that *SOX2* was one of the target genes of ASCL1 in their  
232 ChIP-seq of SCLC cell lines, which included H889 SCLC cell lines. Osada *et al.* (2005, 2008)  
233 reported roles for ASCL1 in CDH1 expression and NE differentiation. Our results support  
234 these findings, and, as a novel insight, ASCL1 and SOX2 cooperatively modulated NE  
235 differentiation or EMT in human SCLC. The knockdown of SOX2 expression in the classical  
236 subtype of the SCLC cell lines examined resulted in significant reductions in WNT11 and  
237 CDH1. In NSCLC, Bartis *et al.* (2013) reported that Wnt11 is a regulator of cadherin  
238 expression and related to the function of cellular adhesion. We previously showed that Ascl1  
239 induced the EMT-like phenotype in A549 ADC cells (Ito *et al.*, 2017), and demonstrated that  
240 WNT11 regulated CDH1 expression in SCLC cell lines (Tenjin *et al.*, 2019). We also

241 confirmed SOX2 binding near the site of the *WNT11* gene in the classical subtype of SCLC  
242 cell lines (data not shown). SOX2 may potentially modulate NE differentiation and CDH1  
243 expression via ASCL1 or WNT11 in SCLC.

244         The results obtained on the knockdown of SOX2 in *ASCL1*-transfected A549 cells are  
245 of interest. After the overexpression of ASCL1, SOX2 expression was enhanced and INSM1  
246 and WNT11 were simultaneously expressed in this cell. The knockdown of SOX2 in  
247 *ASCL1*-transfected cells caused the suppression of INSM1 and WNT11. These results  
248 suggest that ASCL1 activates *SOX2* and regulates INSM1 and WNT11 expression together  
249 with SOX2. Furthermore, NOTCH1, TCF4, MYC, Trp53, and RBL1 expression decreased  
250 after the knockdown of *SOX2* in these cells. Notch signaling is an important cell signaling  
251 system, and the interaction between Notch receptors and their ligands induces several genes,  
252 such as *HES1*, *CCND1*, *MYC*, and *AKT* (Rizzo *et al.*, 2008). Intratumoral heterogeneity  
253 generated by Notch signaling has been shown to promote SCLC (Lim *et al.*, 2014). The  
254 Notch1-Hes1 pathway is a repressor of NE differentiation through the decreased expression  
255 of NE-promoting transcription factors, such as ASCL1 and INSM1 (Ito *et al.*, 2000; Ball *et*  
256 *al.*, 2004; Hassan *et al.*, 2014; Fujino *et al.*, 2015). Chen *et al.* (2012) reported that silencing  
257 of the *SOX2* gene reduced the tumorigenic properties of A549 cells with the attenuated  
258 expression of MYC and NOTCH1 in xenografted tumors in the NOD/SCID mouse. The

259 canonical Wnt pathway induces MYC through TCF4 and other Wnt signal components. In  
260 addition, Wnt11 has been reported to activate both canonical and non-canonical Wnt  
261 pathways (Stewart *et al.*, 2014; Rapp *et al.*, 2017). Moreover, mouse models carrying  
262 conditional alleles for both *Trp53* and *Rb1* developed small cell carcinoma in the lung  
263 (Meuwissen *et al.*, 2003). The universal bi-allelic inactivation of *Trp53* and *RB1* was  
264 previously reported in human samples (George *et al.*, 2015). Meder *et al.* (2016) showed that  
265 NOTCH, ASCL1, Trp53, and RB alterations defined an alternative pathway driving NE and  
266 small cell carcinomas. Moreover, the ablation of all three retinoblastoma family members,  
267 Rb1, Rbl1, and Rbl2, in the mouse lung resulted in the formation of NE tumors (Lázaro *et al.*,  
268 2017). We demonstrated the induction of precursor SCLC lesions that simultaneously  
269 expressed *Ascl1*, *Sox2*, and *Insm1* in *Trp53* (-/-); *CCSPrtTA*; *tetOCre*; *Rb1* (*fl/fl*); *Hes1* (*fl/fl*)  
270 mice. SOX2 has been suggested to play an important role, particularly in an  
271 ASCL1-dependent manner, in the SCLC phenotype and tumorigenesis in the interaction  
272 with these principle tumor suppressants.

273 We performed SOX2 knockdown or knockout experiments using RNAi or the  
274 CRISPR/Cas9 system in the variant subtype of SCLC, SBC3, and H69AR cells. After the  
275 knockdown of *SOX2*, *YAP1* and *TEAD1* mRNA expression levels decreased in these cells. A  
276 previous study reported that YAP1, the main Hippo pathway effector, was frequently lost in



277 high-grade NE lung tumors, and showed reciprocal expression against INSM1 (McCull *et al.*,  
278 2017). Among SCLC, the loss of YAP1 correlated with the expression of NE markers, and a  
279 survival analysis revealed that YAP1-negative cases were more chemo-sensitive than  
280 YAP1-positive cases (Ito *et al.*, 2016). The YAP/TAZ subgroup displayed an adherent cell  
281 morphology (Horie *et al.*, 2016) and lower expression levels of ASCL1. *REST* was also  
282 included in the genes of SOX2-bound sites in variant subtypes. *REST* encodes a  
283 transcriptional repressor that represses neuronal and NE genes in non-neuronal and  
284 non-NE tissues and, thus, serves as a negative regulator of neurogenesis, including SCLC  
285 (Gao *et al.*, 2011; Thiel *et al.*, 2015; Lim *et al.*, 2017). We demonstrated that SOX2 modulated  
286 the Hippo pathway in the variant subtype of SCLC in the present study. We also showed  
287 that *VIMENTIN* mRNA levels decreased after the knockdown of SOX2 in these cells. In the  
288 classical subtype of SCLC cell lines, *CDH1* expression decreased after the knockdown of  
289 SOX2 by RNAi (Fig. 3A). These results suggest that SOX2 potently modulated EMT in lung  
290 cancer via the Hippo or Wnt signaling pathway in SCLC.

291 Rudin *et al.* (2012) reported that the knockdown of *SOX2* by doxycycline-inducible  
292 shRNA inhibited cell proliferation in SCLC cell lines. In the classical subtype SCLC cell  
293 lines, we demonstrated that SOX2-knockdown using RNAi decreased tumor cell  
294 proliferative capacity. In contrast, the knockdown of *SOX2* in SBC3 and H69AR cells did not

295 significantly affect their cell proliferative capacity. This functional discrepancy may be  
296 attributed to functional differences in Sox2 between the classical and variant subtypes of  
297 SCLC. Furthermore, Rudin *et al.* (2019) recently proposed a nomenclature to describe SCLC  
298 subtypes according to the dominant expression of transcription factors. They divided SCLC  
299 into 4 subtypes, which considered the master regulators of SCLC; ASCL1, NEUROD1,  
300 POU2F3, or YAP1. In the present study, we revealed that SOX2 cooperated with the key  
301 regulatory molecules, such as ASCL1 and YAP1, in SCLC, and showed that SCLC may be  
302 divided into 3 groups based on the expression of ASCL1 and SOX2; ASCL1-SOX2 doubly  
303 high, ASCL1 low and SOX2 high, and ASCL1-SOX2 doubly low (Fig. 6). In addition to  
304 genomic profiling, which has been adopted in clinical practice, several research initiatives to  
305 catalog DNA, RNA, and protein profiles among lung SCC and ADC have accelerated the  
306 pace of discovery, such as The Cancer Genome Atlas (TCGA). However, similar efforts have  
307 not yet been achieved for SCLC due to the lack of adequate tumor tissue (Byers *et al.*, 2015).  
308 This needs to be investigated in a large prospective or cohort study in the future.

309 In summary, the classical subtype of SCLC frequently and strongly expresses both  
310 SOX2 and ASCL1. ASCL1-recruited SOX2 plays an important role in driving distinct  
311 transcriptional regulation. We demonstrated that SOX2 regulates lineage-specific genes,  
312 such as *INSM1*, in the classical subtype of SCLC. While we revealed the significance of

313 SOX2 for cell growth and the modulation of EMT, we detected a functional discrepancy in  
314 SOX2 between the classical and variant subtypes of SCLC. The present results suggest that  
315 the ASCL1-SOX2 axis is extremely important as a potential therapeutic target or biological  
316 marker in the classical subtype of SCLC. On the other hand, the fundamental role of SOX2  
317 in the variant subtype, in which ASCL1 is negative, was shown in the activation of the  
318 Hippo signaling pathway. Further studies on SOX2 that focus on highly specific molecules,  
319 for example, those that are involved in the recruitment of SOX2 in the variant subtype of  
320 SCLC, are needed. The present study promotes our understanding of the significance of  
321 SOX2 in SCLC, which will hopefully lead to the development of novel targeted therapies and  
322 better prognoses for patients with SCLC.

323

## 324 **Materials and Methods**

### 325 **Cell Lines**

326 Seven SCLC cell lines (H69, H889, SBC1, H69AR, H1688, SBC3, and SBC5), 3 ADC  
327 cell lines (A549, H358, and H1975), and 2 SCC cell lines (H2170 and H226) were used in the  
328 present study. H69, H889, H69AR, H1688, A549, H358, H1975, H2170, and H226 were  
329 purchased from ATCC (Manassas, VA), and SBC1, SBC3, and SBC5 from the Japan  
330 Collection of Research Bioresources Cell Bank (Osaka, Japan). All growth media were

331 purchased from Wako Pure Chemical Industries Ltd. (Osaka, Japan) and supplied with 1%  
332 penicillin/streptomycin (Sigma–Aldrich, Ontario, Canada). A549 cells were grown in DMEM  
333 supplemented with 10% FBS (Hyclone, Logan, UT). SBC-3 cells were grown in EMEM with  
334 10% FBS. H69, H1688, and H2170 cells were grown in RPMI 1640 medium supplemented  
335 with 2 mM L-glutamine, 10 nM HEPES, 1 mM sodium pyruvate, 4.5 g/L glucose, 1.5 g/L  
336 sodium bicarbonate, and 10% FBS. H69AR cells were grown in similar RPMI 1640 medium,  
337 but supplemented with 20% FBS. All cells were incubated at 37 °C in 5% CO<sub>2</sub> and saturated  
338 humidity. Cells were maintained as subconfluent cultures before use and harvested with  
339 trypsin-EDTA (Invitrogen, Carlsbad, CA).

340

#### 341 **Tissue Samples**

342 We obtained tissue samples of SCLCs (n=30), ADCs (n=20), and SCCs (n=20) from the  
343 lung cancer files of the Department of Pathology and Experimental Medicine of Kumamoto  
344 University and resected at the Department of Thoracic Surgery of Kumamoto University  
345 from 70 patients for this study. A histological diagnosis of the samples was made according  
346 to the criteria of the WHO (Travis *et al.*, 2015). These sections were used for IHC staining.  
347 The present study followed the guidelines of the Ethics Committee of Kumamoto University.

348

349 **WB Analysis**

350 Cells were prepared for a WB analysis as previously described (Yoshida *et al.*, 2013). A  
351 list of the primary antibodies used is shown in Table 2. Membranes were washed and  
352 incubated with the respective secondary antibodies conjugated with peroxidase (Amersham  
353 Pharmacia Biotech, Buckinghamshire, UK) for 1 hour, and the immune complex was  
354 visualized with the chemiluminescence substrate (Amersham Pharmacia Biotech, UK).

355

356 **ChIP**

357 Three SCLC cell lines (H69, H889, and SBC3), A549 ADC cell lines, and an A549 cell  
358 line with the stable expression of ASCL1 were used in the present study. Cells were fixed in  
359 1% formaldehyde (Thermo-Fisher) in PBS at room temperature for 10 minutes. Crosslinked  
360 cells were lysed with LB1 (50 mM HEPES-KOH (pH7.5), 140 mM NaCl, 1 mM EDTA, 10%  
361 (w/v) glycerol, 0.5% (w/v) NP-40, 0.25% (w/v) TritonX-100, proteinase inhibitor cocktail  
362 (Sigma)) and washed with LB2 (10 mM Tris-HCl (pH 8.0), 200 mM NaCl, 1 mM EDTA, 0.5  
363 mM EGTA, proteinase inhibitor cocktail). Chromatin lysates were prepared in RIPA buffer  
364 (Thermo 89900; 25 mM Tris-HCl pH7.6, 150 mM NaCl, 0.1% SDS, 1% NP-40, 1% sodium  
365 deoxycolate, proteinase inhibitor cocktail), sonication with Covaris S220 (Peak Incident  
366 Power, 175 : Acoustic Duty Factor, 10% : Cycle Per Burst, 200 : Treatment time, 600sec :

367 Cycle, 6). ChIP was performed using chromatin lysates equivalent to  $1.0 \times 10^7$  cells, and  
368 protein A Dyna-beads (Thermo-Fisher) coupled with the antibody against Sox2 (raised by  
369 us). After 4 hours of incubation at 4 °C, beads were washed 4 times in a low salt buffer (20  
370 mM Tris-HCl (pH 8.0), 0.1% SDS, 1% (w/v) TritonX-100, 2 mM EDTA, 150 mM NaCl), and  
371 two times with a high salt buffer (20 mM Tris-HCl (pH 8.0), 0.1% SDS, 1% (w/v) TritonX-100,  
372 2 mM EDTA, 500 mM NaCl). Chromatin complexes were eluted from the beads by agitation  
373 in elution buffer (10 mM Tris-HCl (pH 8.0), 300 mM NaCl, 5 mM EDTA, 1% SDS) and  
374 incubated overnight at 65 °C for reverse-crosslinking. Eluates were treated with RNase A  
375 and Proteinase K, and DNA was ethanol precipitated.

376

### 377 **ChIP-seq data analysis**

378 ChIP-seq libraries were prepared using 20 ng of input DNA, and 1-3 ng of ChIP DNA  
379 with KAPA Library Preparation Kit (KAPA Biosystems) and NimbleGen SeqCap Adaptor  
380 Kit A or B (Roche) and sequenced by Illumina NextSeq 500 (Illumina) using Nextseq  
381 500/550 High Output v2 Kit (Illumina) to obtain single end 75-nt reads. The resulting reads  
382 were trimmed to remove the adapter sequence and low-quality ends using Trim Galore!  
383 v0.4.3 (cutadapt v.1.15). The trimmed ChIP-seq reads were mapped to the UCSC hg38  
384 genome assemblies using Bowtie2 v2.3.3 with default parameters. The resulting SAM files

385 were converted to the BAM format using SAMtools v1.5. Peak calling was performed using  
386 MACS2 v2.1.1. with input DNA as a control including a q-value cut-off of 0.01 for SOX2  
387 ChIP-seq. The distance to the nearest TSS and gene feature of the peaks were obtained from  
388 Ensembl human annotation data (GRCh38) using the `annotatePeakInBatch` of  
389 `ChIPpeakAnno` and `biomaRt` R packages. Peaks in the gene body were first annotated with  
390 the option `'output="overlapping"`, and the remained peaks were then annotated to the  
391 nearest TSSs regardless of the distance between them. Protein binding sites were shown  
392 along with genomic loci from RefSeq genes on the genome browser IGV.

393

#### 394 **RNA sequence (RNA-seq)**

395 RNA-seq was performed by the Liaison Laboratory Research Promotion Center  
396 (LILA) (Kumamoto University) as follows. Total RNA was isolated using the RNeasy Mini  
397 Kit (Qiagen, Germany). 2100 Bioanalyzer was used to detect the concentration and purity of  
398 total RNA. All samples with an RNA integrity number (RIN) >7.5 were used for sequencing.  
399 Library DNA prepared according the Illumina Truseq protocol using Truseq Standard  
400 mRNA LT Sample Prep Kits and sequenced by Nextseq 500 (Illumina) was used for analysis,  
401 and the data were converted to Fastq files. Quality control of the data was performed by  
402 FastQC. The reads were then trimmed to remove the adapter sequence using Trim Galore!

403 v0.5.0 (Cutadapt v 1.16), and low-quality reads were filtered out using FASTX-toolkit  
404 v0.0.14. The remaining reads were aligned to the Ensembl GRCh38.93 reference genome  
405 using STAR ver.2.6.0a. FPKM (fragments per kilobase of exon per million reads mapped)  
406 values were calculated using Cuffdiff. Significant genes were extracted by cuffdiff ( $p < 0.05$ ).  
407 A differential expression analysis was performed using the ExAtlas website  
408 (<https://lgsun.irp.nia.nih.gov/exatlas/>).

409

#### 410 **Gene ontology (GO) analysis**

411 GO annotation and classification were based on three categories, including biological  
412 process, molecular function, and cellular component. The Database for Annotation,  
413 Visualization, and Integrated Discovery Bioinformatics Resources 6.7 (DAVID 6.7,  
414 <http://www.david.niaid.nih.gov>) was used for the GO analysis (Huang *et al.*, 2009). The gene  
415 lists contained significant genes in the RNA-seq analysis and were also targeted by Sox2 in  
416 our ChIP-seq analysis. To visualize key biological processes, the DAVID online database was  
417 used. The top 10 categories in each classical and variant subgroup of SCLC were taken as  
418 excerpts for Fig. 1C.

419

#### 420 **Transfection with siRNA**



421 We purchased Sox2 siRNA (sc-41120) and Ascl1 siRNA (sc-37692) from Santa Cruz  
422 Biotechnology (Santa Cruz, USA) and transfected them into cells using an electroporator  
423 (NEPA21 pulse generator; Nepa Gene, Chiba, Japan) as described in the manufacturer's  
424 instructions. These were a pool of 3 different siRNA duplexes and sequences for Sox2 were  
425 as follows. sense; 5'-GAAUGGACCUUGUAUAGAUTT -3', antisense;  
426 5'-AUCUAUACAAGGUCCAUUCTT -3' (sc-38408A), sense; 5' -  
427 GGACAGUUGCAAACGUGAATT -3', antisense; 5'-UUCACGUUUGCAACUGUCCTT -3'  
428 (sc-38408B), and sense; 5'-GAAUCAGUCUGCCGAGAAUTT -3', antisense; 5'-  
429 AUUCUCGGCAGACUGAUUCTT -3' (sc-41120C). The sequences for Ascl1 were as follows.  
430 sense; 5'-CCAACAAGAAGAUGAGUAATT-3', antisense;  
431 5'-UUACUCAUCUUCUUGUUGGTT-3' (sc-37692A), sense; 5'-  
432 GAAGCGCUCAGAACAGUAUTT-3', antisense; 5'- AUACUGUUCUGAGCGCUUCTT-3'  
433 (sc-37692B), sense; 5'- GUUCGGGGAUUAUUAAGATT-3', antisense; 5'-  
434 UCUUAAUUAUACCCCGAACTT-3' (sc-37692B). Control siRNA (Cat# sc-36869) was used  
435 as a control. Cells were harvested 48-72 h post-transfection.

436

#### 437 **Plasmid construction and transfection**

438 To construct pCAG-IRES-puro-FlagHA, we replicated the *ASCL1* gene of a human

439 *ASCL1* cDNA ORF clone and replaced it with *ASCL1*. We generated  
440 pCAG-IRES-puro-FlagHA -mock from a human *ASCL1* cDNA ORF clone by cleaving out  
441 *ASCL1*. Two plasmids were transfected into A549 cells with Lipofectamine 3000 (Invitrogen)  
442 as described in the manufacturer's instructions. After 48 h, 1 µg/mL of puromycin (Clontech)  
443 was added to cells for 2 weeks, with a medium change every 3 days. Stably transfected  
444 resistant cell lines were cloned from each transfectant.

445

#### 446 **Cell counting assay**

447 A cell counting method was used to evaluate the role of Sox2 in cell proliferation. After  
448 48 h of siRNA and control transfection, cells were stained with trypan blue and counted.  
449 H69, H889, and SBC1 cells were used and seeded at  $2 \times 10^5$  cells on 6-well plates. Every 2  
450 days, cells were collected and counted, after which they were seeded into new fresh medium  
451 and left at 37 °C in 5% CO<sub>2</sub>. The counting method was continued until day 6. The criteria for  
452 cellular integrity included trypan blue exclusion, an intact nucleus, and intact cell  
453 membrane. Experiments were repeated three times separately to confirm reproducibility.

454

#### 455 **IHC and evaluation**

456 Formalin-fixed, paraffin-embedded specimens were cut into 4- $\mu$ m-thick sections and  
457 mounted onto MAS-GP-coated slides (Matsunami Glass Ind., Osaka, Japan). After being  
458 deparaffinized and rehydrated, sections were heated using an autoclave in 0.01 mol/L  
459 citrate buffer (pH 7.0) for antigen retrieval. Sections were incubated with 0.3% H<sub>2</sub>O<sub>2</sub> in  
460 absolute methanol for 30 minutes to block endogenous peroxidase activity. Sections were  
461 then incubated with skimmed milk for 30 minutes to block non-specific staining. After this  
462 blocking step, sections were incubated with the primary antibodies shown in Table 2 at 4°C  
463 overnight. This was followed by sequential 1-hour incubations with the secondary antibodies  
464 (En Vision+ System-HRP-Labeled Polymer; Dako) and visualization with the Liquid DAB+  
465 Substrate Chromogen System (Dako). All slides were counterstained with hematoxylin for  
466 30 seconds before being dehydrated and mounted. We evaluated IHC results based on  
467 staining intensity and the percentage of positively stained tumor cells. The percentage of  
468 positively stained tumor cells was divided into five groups: no staining, <5% tumor cells  
469 reactive, 5–25% reactive, 25-50% reactive, and >50% reactive. The staining intensity level  
470 was divided into three groups: negative, weak, and strong. We designed a table to allocate  
471 IHC scores to each specimen. IHC scores were classified into three groups: negative (0),  
472 weak positive (1+), and positive (2+). We defined a 2+ IHC score as significantly positive.

473 Scoring was simultaneously performed by two independent observers who were blinded to  
474 patient details.

475

#### 476 **qRT-PCR**

477 Total RNA was isolated using an RNeasy Mini Kit (Qiagen, Germany) in accordance  
478 with the manufacturer's instructions. cDNA was produced using a ReverTra Ace qPCR  
479 RT-kit (Toyobo, Osaka, Japan), according to the manufacturer's instructions. A list of the  
480 primers used is shown in Table 3. cDNA was subjected to quantitative SYBR Green  
481 real-time PCR by using SYBR Premix Ex Taq II (Takara Bio). A list of the specific primers  
482 used is shown in Table 3. qRT-PCR was performed with a LightCycler® Nano (Roche  
483 Diagnostic K.K.) using 40 cycles of a three-stage program with the following conditions: 20  
484 seconds at 94°C, 40 seconds at 60°C, and 15 seconds at 72°C, as recommended by the  
485 manufacturer. The products were quantified during the initial exponential phase of  
486 amplification above the baseline. Data were obtained from triplicate reactions. The means  
487 and SDs of the copy numbers were normalized to the value for *glyceraldehyde-3-phosphate*  
488 *dehydrogenase (GAPDH)* mRNA.

489

490 ***SOX2* knockout experiment using SBC3 and H69AR cell lines**

491 Genome editing using CRISPR/Cas9 was used for the knockout of the *SOX2* gene in  
492 the SBC3 and H69AR cell lines. We purchased a *SOX2*-knockout vector from GeneCopoeia™  
493 (Rockville, USA). These were 3 different human *SOX2* sgRNA/Cas9 all-in-one expression  
494 clones (NM\_003106.2). The sgRNA target sequences of *SOX2* were as follows:  
495 ATGGGCCGCTTGACGCGGTC (HCP217628-CG10-3-10-a), CGCCCGCATGTACAACATGA  
496 (HCP217628-CG10-3-10-b), and ATTATAAATACCGGCCCGG (HCP217628-CG10-3-10-c).  
497 CCPCTR01-CG10 (GeneCopoeia™) was used as a control. The sgRNA target sequence was  
498 as follows: GGCTTCGCGCCGTAGTCTTA. Regarding the establishment of *SOX2*-knockout  
499 H69AR cells, we obtained pSpCas9(BB)-2A-Puro(px459) from Addgene (Cambridge, MA)  
500 (Ran *et al.*, 2013). The sgRNA target sequences of *SOX2* were as follows:  
501 ATAATAACAATCATCGGCGG, GACCGCGTCAAGCGGCCCAT and  
502 ACAGCCCGGACCGCGTCAAG. Cells were harvested 48-72 hr post-transfection. These  
503 plasmids were co-transfected with Lipofectamine 3000 (Thermo Fisher Scientific) into cells  
504 at subconfluency. After 48 hr, transfected cells were treated with 200 µg/mL hygromycin B  
505 (Nacalai Tesque, Kyoto, Japan) or 1 µg/mL puromycin (Clontech) for the selection of stably  
506 transfected cells.

507

508 **Tumor xenotransplantation experiment**

509           Eight-week-old male Rag2(-/-):Jak3(-/-) mice (a generous gift from Prof. S. Okada;  
510   Kumamoto University) were used. Two groups of mice were subcutaneously injected; one  
511   group was injected with  $2 \times 10^6$  stably transfected cells with *ASCL1*, and the other group  
512   was injected with an equal number of the control cell population. After 4 weeks,  
513   subcutaneous tumors were removed and fixed. The samples were fixed with 10% formalin  
514   and embedded in paraffin. Tissue sets were stained with hematoxylin and eosin and  
515   additional sections were used for IHC staining. Regarding tumor xenograft growth, a total of  
516    $1.0 \times 10^6$  cells each of the mock-transfected and *SOX2* knockout SBC3 cell lines and mock  
517   cells were subcutaneously injected into the backs of mice. Twenty days after the first  
518   injection, tumors were removed and measured. All animal experiments were performed in  
519   accordance with the Institutional Animal Care and Use Committee guidelines.

520

#### 521   ***In situ* precursor SCLC model mouse**

522           We established a genetically engineered mouse model for *in situ* SCLC precursor  
523   lesions. These mice are *Trp53* gene-deficient, have Clara cell secretory protein promoter  
524   (CCSP) rt TA, tetO Cre-recombinase, floxed *Rb1*, and floxed *Hes1* genes, and were kept  
525   under the hypothesis that tumorigenesis of SCLC may occur with the double knockout of the  
526   suppressor oncogenes, *p53* and *Rb1*, and inactivation of the Notch signal pathway (Meder *et*

527 *al.*, 2016). *P53* KO mice (ICR.Cg-*Trp53*<sup>tm1Sia</sup>/Rbrc) (Tsukuda T *et al.*, 1993) were  
528 obtained from the Riken BioResource Center (Tsukuba, Japan), CCSPrTA; tetOCre mice  
529 (Tichelarr *et al.*, 2002) were a generous gift from Dr. J. Whitsett. Floxed *Rb1* mice  
530 (FVB;129-Rb1<sup>tm2Brr</sup>/Nci; Vooijs *et al.*, 1999) were obtained from the NCI Mouse Repository  
531 (Frederick, MD), and floxed *Hes1* mice (Imayoshi *et al.*, 2008) from Dr. R. Kageyama of  
532 Kyoto University. Animals were kept under standard laboratory conditions with free access  
533 to water and food, and were maintained on a 12-h light/dark cycle under pathogen-free  
534 conditions. Doxycycline (Sigma-Aldrich) was dissolved in drinking water at a concentration  
535 of 1 g/L, and given to 4-week-old male animals for 6 weeks. After the treatment with  
536 doxycycline, animals were sacrificed with an intraperitoneal injection of an overdose of  
537 pentobarbital, and lung tissues were fixed in phosphate-buffered fixed 4%  
538 paraformaldehyde for 1 week. Fixed lung tissues were embedded in paraffin, and paraffin  
539 sections were used for hematoxylin eosin staining and immunostaining for *Ascl1*, *Sox2*, and  
540 *Insm1*. The present study was approved by the Animal Care Committee of Kumamoto  
541 University (#A2019-038).

542

#### 543 **Statistical analysis**

544 Spearman's correlation coefficient ( $\rho$ ) was calculated for the correlation analysis. Cell

545 counting data were expressed as the means  $\pm$  standard deviation of triplicate measurements.  
546 Differences in mean values between the groups were analyzed by a two-tailed statistical  
547 analysis using the Student's *t*-test. GraphPad Prism version 7.04 (San Diego, CA) was used  
548 for the statistical analysis. *p* values less than 0.05 were considered to be significant.

#### 549 **Dataset availability**

550 The dataset produced in this study is available in the following database:

551 • RNA-seq data: Gene Expression Omnibus GSE60052

552 (<https://www.ncbi.nlm.nih.gov/geo/query/acc.cgi?acc=GSE60052>)

553

#### 554 **References**

555 Ball DW, Azzoli CG, Baylin SB, Chi D, Dou S, Donis-Keller H, Cumaraswamy A, Borges M,

556 Nelkin BD (1993) Identification of a human achaete-scute homolog highly expressed

557 in neuroendocrine tumors. *Proc Natl Acad Sci U S A* 90: 5648-52

558 Ball DW (2004) Achaete-scute homolog-1 and Notch in lung neuroendocrine development

559 and cancer. *Cancer Lett* 204: 159-69

560 Bartis D, Csongei V, Weich A, Kiss E, Barko S, Kovacs T, Avdicevic M, D'Souza VK, Rapp J,

561 Kvell K, Jakab L, Nyitrai M, Molnar TF, Thickett DR, Laszlo T, Pongracz JE (2013)



- 562 Down-Regulation of Canonical and Up-Regulation of Non-Canonical Wnt Signalling  
563 in the Carcinogenic Process of Squamous Cell Lung Carcinoma. PLoS One 8: e57393.7
- 564 Borges M, Linnoila RI, van de Velde HJ, Chen H, Nelkin BD, Mabry M, Baylin SB, Ball DW  
565 (1997) An achaete-scute homologue essential for neuroendocrine differentiation in the  
566 lung. Nature 386: 852-6
- 567 Borromeo MD, Savage TK, Kollipara RK, He M, Augustyn A, Osborne JK, Girard L, Minna  
568 JD<sup>6</sup>, Gazdar AF<sup>7</sup>, Cobb MH<sup>8</sup>, Johnson JE (2016) ASCL1 and NEUROD1 Reveal  
569 Heterogeneity in Pulmonary Neuroendocrine Tumors and Regulate Distinct Genetic  
570 Programs. Cell Rep 16: 1259-72
- 571 Byers LA, Rudin CM. Small cell lung cancer: where do we go from here? (2015) Cancer 121:  
572 664-72
- 573 Carney DN, Gazdar AF, Bepler G, Guccion JG, Marangos PJ, Moody TW, Zweig MH, Minna  
574 JD (1985) Establishment and identification of small cell lung cancer cell lines having  
575 classic and variant features. Cancer Res 45: 2913-23
- 576 Chen S, Xu Y, Chen Y, Li X, Mou W, Wang L, Liu Y, Reisfeld RA, Xiang R, Lv D, Li N (2012)  
577 SOX2 gene regulates the transcriptional network of oncogenes and affects  
578 tumorigenesis of human lung cancer cells. PLoS ONE 7: e36326

579 Fujino K, Motooka Y, Hassan WA, Ali Abdalla MO, Sato Y, Kudoh S, Hasegawa K,  
580 Niimori-Kita K, Kobayashi H, Kubota I, Wakimoto J, Suzuki M, Ito T (2015) INSM1 is  
581 a crucial regulator of neuroendocrine differentiation in lung cancer. *Am J Pathol* 185:  
582 3164–77

583 Gao Z, Ure K, Ding P, Nashaat M, Yuan L, Ma J, Hammer RE, Hsieh J (2011) The master  
584 negative regulator REST/NRSF controls adult neurogenesis by restraining the  
585 neurogenic program in quiescent stem cell. *J Neurosci* 31: 9772-86

586 Gazdar AF, Bunn PA, Minna JD (2017) Small-cell lung cancer: what we know, what we  
587 need to know and the path forward. *Nat Rev Cancer* 17: 765

588 Gazdar AF, Carney DN, Nau MM, Minna JD (1985) Characterization of variant subclasses  
589 of cell lines derived from small cell lung cancer having distinctive biochemical,  
590 morphological, and growth properties. *Cancer Res* 45: 2924-30

591 George J, Lim JS, Jang SJ, Cun Y, Ozretić L, Kong G, Leenders F, Lu X, Fernández-Cuesta  
592 L, Bosco G, Müller C, Dahmen I, Jahchan NS, Park KS, Yang D, Karnezis AN, Vaka D,  
593 Torres A, Wang MS, Korbelt JO et al (2015) Comprehensive genomic profiles of small  
594 cell lung cancer. *Nature* 524: 47-53.

- 595 Hassan WA, Yoshida R, Kudoh S, Hasegawa K, Niimori-Kita K, Ito T (2014) Notch1 controls  
596 cell invasion and metastasis in small cell lung carcinoma cell lines. *Lung Cancer* 86:  
597 304-10
- 598 Horie M, Saito A, Ohshima M, Suzuki HI, Nagase T (2016) YAP and TAZ modulate cell  
599 phenotype in a subset of small cell lung cancer. *Cancer Sci* 107: 1755-1766
- 600 Huang DW, Sherman BT, Lempicki RA (2009) Systematic and integrative analysis of large  
601 gene lists using DAVID bioinformatics resources. *Nature Protoc* 4: 44-57
- 602 Imayoshi I, Shimogori T, Ohtsuka T, Kageyama R (2008) Hes genes and neurogenin regulate  
603 non-neural versus neural fate specification in the dorsal telencephalic midline.  
604 *Development* 135:2531-2541
- 605 Ito T, Kudoh S, Ichimura T, Fujino K, Hassan WA, Udaka N (2017) Small cell lung cancer, an  
606 epithelial to mesenchymal transition (EMT)-like cancer: significance of inactive Notch  
607 signaling and expression of achaete-scute complex homologue 1. *Hum Cell* 30: 1-10
- 608 Ito T, Matsubara D, Tanaka I, Makiya K, Tanei ZI, Kumagai Y, Shiu SJ, Nakaoka HJ,  
609 Ishikawa S, Isagawa T, Morikawa T, Shinozaki-Ushiku A, Goto Y, Nakano T, Tsuchiya  
610 T, Tsubochi H, Komura D, Aburatani H, Dobashi Y, Nakajima J (2016) Loss of YAP1  
611 defines neuroendocrine differentiation of lung tumors. *Cancer Sci* 107: 1527-38

- 612 Ito T, Udaka N, Yazawa T, Okudela K, Hayashi H, Sudo T, Guillemot F, Kageyama R,  
613 Kitamura H (2000) Basic helix-loop-helix factors regulate the neuroendocrine  
614 differentiation of fetal mouse pulmonary epithelium. *Development* 127: 3913–21
- 615 Jiang L, Huang J, Higgs BW, Hu Z, Xiao Z, Yao X, Conley S, Zhong H, Liu Z, Brohawn P,  
616 Shen D, Wu S, Ge X, Jiang Y, Zhao Y, Lou Y, Morehouse C, Zhu W, Sebastian Y,  
617 Czapiga M (2016) Genomic landscape survey identifies SRSF1 as a key oncogene in  
618 small cell lung cancer. *PLoS Genet* 12: e1005895
- 619 Lim JS, Ibaseta A, Fischer MM, Cancilla B, O'Young G, Cristea S, Luca VC, Yang D,  
620 Jahchan NS, Hamard C, Antoine M, Wislez M, Kong C, Cain J, Liu YW, Kapoun AM,  
621 Garcia KC, Hoey T, Murriel CL, Sage J (2017) Intratumoural heterogeneity generated  
622 by Notch signaling promotes small-cell lung cancer. *Nature* 545: 360-364
- 623 Lázaro S, Pérez-Crespo M, Enguita AB, Hernández P, Martínez-Palacio J, Oteo M, Sage J,  
624 Paramio JM, Santos M (2017) Ablating all three retinoblastoma family members in  
625 mouse lung leads to neuroendocrine tumor formation. *Oncotarget* 8: 4373-4386
- 626 McColl K, Wildey G, Sakre N, Lipka MB, Behtaj M, Kresak A, Chen Y, Yang M, Velcheti V,  
627 Fu P, Dowlati A (2017) Reciprocal expression of INSM1 and YAP1 defines subgroups  
628 in small cell lung cancer. *Oncotarget* 8: 73745-73756.
- 629 Meder L, König K, Ozretić L, Schultheis AM, Ueckerth F, Ade CP, Albus K, Boehm D,

630 Rommerscheidt-Fuss U, Florin A, Buhl T, Hartmann W, Wolf J, Merkelbach-Bruse S,  
631 Eilers M, Perner S, Heukamp LC, Buettner R (2016) NOTCH, ASCL1, p53, and RB  
632 alterations define an alternative pathway driving neuroendocrine and small cell  
633 carcinomas. *Int J Cancer* 138: 927-38

634 Meuwissen R, Linn SC, Linnoila RI, Zevenhoven J, Mooi WJ, Berns A (2003) Introduction of  
635 small cell lung cancer by somatic inactivation of both Trp53 and Rb1 in a conditional  
636 mouse model. *Cancer Cell* 4:181-9

637 Osada H, Tatematsu Y, Yatabe Y, Horio Y, Takahashi T (2005) ASH1 gene is a specific  
638 therapeutic target for lung cancers with neuroendocrine features. *Cancer Res* 65:  
639 10680-5

640 Osada H, Tomida S, Yatabe Y, Tatematsu Y, Takeuchi T, Murakami H, Kondo Y, Sekido Y,  
641 Takahashi T (2008) Roles of achaete-scute homologue 1 in DKK1 and E-cadherin  
642 repression and neuroendocrine differentiation in lung cancer. *Cancer Res* 68: 1647-55

643 Ran F, Hsu PD, Wright J, Agarwala V, Scott DA, and Zhang F (2013) Genome engineering  
644 using the CRISPR-Cas9 system. *Nat Protoc* 8: 2281-2308

645 Rapp J, Jaromi L, Kvell K, Miskei G, Pongracz JE (2017) WNT signaling - lung cancer is no  
646 exception. *Respir Res* 18:167

- 647 Rizzo P, Osipo C, Foreman K, Golde T, Osborne B, Miele L (2008) Rational targeting of Notch  
648 signaling in cancer. *Oncogene* 27: 5124-31
- 649 Rudin CM, Durinck S, Atawiski F, Poirier JT, Modrusan Z, Shames DS, Bergbower EA,  
650 Guan Y, Shin J, Guillory J, Rivers CS, Foo CK, Bhatt D, Stinson J, Gnad F, Haverty  
651 PM, Gentleman R, Chaudhuri S, Janakiraman V, Jaiswal BS et al (2012)  
652 Comprehensive genomic analysis identifies SOX2 as a frequently amplified gene in  
653 small-cell lung cancer. *Nat Genet* 44: 1111-6
- 654 Rudin CM, Poirier JT, Byers LA, Dive C, Dowlati A, George J, Heymach JV, Johnson JE,  
655 Lehman JM, MacPherson D, Massion PP, Minna JD, Oliver TG, Quaranta V, Sage J,  
656 Thomas RK, Vakoc CR, Gazdar AF (2019) Molecular subtypes of small cell lung  
657 cancer: a synthesis of human and mouse model data. *Nat Rev Cancer* 19: 289-297
- 658 Stewart DJ (2014) Wnt signaling pathway in non-small cell lung cancer. *J Natl Cancer Inst*  
659 106:djt356
- 660 Tenjin Y, Kudo S, Kubota S, Yamada T, Matsuo A, Sato Y, Ichimura T, Kohrogi H, Sashida G,  
661 Sakagami T, Ito T (2019) Ascl1-induced Wnt11 regulates neuroendocrine  
662 differentiation, proliferation and E-cadherin expression in small-cell lung cancer and  
663 Wnt11 regulates small-cell lung cancer biology. *Lab Invest* doi:  
664 10.1038/s41374-019-0277-y.

- 665 Thiel G, Ekici M, Rossler OG (2015) RE-1 silencing transcription factor (REST): a regulator  
666 of neuronal development and neuronal/endocrine function. *Cell Tissue Res* 359:  
667 99-109
- 668 Tichelarr J, Lu W, Whitsett J (2002), Conditional expression of fibroblast growth factor-7 in  
669 the developing and mature lung. *J Biol Chem* 275:11858-11864
- 670 Travis WD, Brambilla E, Burke AP, Marx, A., Nicholson, A. G (2015) WHO classification of  
671 tumours of the lung, pleura, thymus and heart, 4th ed. Lyon, France, IARC, 63-68
- 672 Tsukuda T, Tomooka Y, Takai S, Ueda Y, Nishikawa S, Yagi T, Tikunnaga T, Takeda N, Suda  
673 Y, Abe S (1993) Enhanced proliferative potential in culture of cells from p53-deficient  
674 mice. *Oncogene* 8:3313-3322
- 675 Vooijs M, Berns A (1999) Developmental defects and tumor predisposition in Rb mutant  
676 mice. *Oncogene* 18: 5293-303.
- 677 Wael H, Yoshida R, Kudoh S, Hasegawa K, Niimori-Kita K, Ito T (2014) Notch1 signaling  
678 controls cell proliferation, apoptosis and differentiation in lung carcinoma. *Lung*  
679 *Cancer* 85: 131–40
- 680 Wang S, Tang J, Sun T, Zheng X, Li J, Sun H, Zhou X, Zhou C, Zhang H, Cheng Z, Ma H,  
681 Sun H (2017) Survival changes in patients with small cell lung cancer and disparities  
682 between different sexes, socioeconomic statuses and ages. *Sci Rep* 7: 1339

683 Yoshida R, Nagata M, Nakayama H, Niimori-Kita K, Hassan W, Tanaka T, Shinohara M, Ito  
684 T (2013) The pathological significance of Notch1 in oral squamous cell carcinoma. *Lab*  
685 *Invest* 93: 1068-81

686 Zhang W, Girard L, Zhang YA, Haruki T, Papari-Zareei M, Stastny V, Ghayee HK, Pacak K,  
687 Oliver TG, Minna JD, Gazdar AF (2018) Small cell lung cancer tumors and preclinical  
688 models display heterogeneity of neuroendocrine phenotypes. *Transl Lung Cancer Res*  
689 7: 32-49

690

#### 691 **Acknowledgments**

692 We thank Ms. Yuko Fukuchi and Ms. Takako Maeda for their technical assistance; the  
693 staff of LILA for their technical support; the Institute of Molecular Embryology and Genetics,  
694 Kumamoto University for its help with the RNA-seq analysis. This study was partially  
695 supported by a Grant-in-Aid for Scientific Research from the Ministry of Education, Culture,  
696 Sports, Science and Technology of Japan 18K19480 and by Aihara Pediatric and Allergy  
697 Clinic, Yokohama, Japan. This study was also supported in part by the program of the Joint  
698 Usage/Research Center for Developmental Medicine, Institute of Molecular Embryology and  
699 Genetics, Kumamoto University.

700



701 **Conflicts of interest**

702 We have no conflicts of interest to disclose.

703

704 **Figure legends**

705 Fig. 1: (A) WB analysis of SOX2, ASCL1, and INSM1 in lung cancer cell lines,  
706 including small cell lung carcinoma (SCLC), adenocarcinoma (ADC), and squamous cell  
707 carcinoma (SCC). SOX2 was more strongly expressed in all SCLC cell lines than in the  
708 NSCLCs examined. Four out of the 7 SCLC cell lines simultaneously expressed ASCL1 and  
709 INSM1.  $\beta$ -ACTIN served as an internal control. (B) ChIP-seq and RNA-seq were conducted  
710 to analyze putative SOX2 target genes and mRNA expression in the H69, H889, and SBC3  
711 cell lines. As shown in a Venn plot, 346 specific SOX2-bound genes, which also significantly  
712 expressed mRNAs in the classical subtype, were identified (shared in NCI-H69 and  
713 NCI-H889). *INSM1* was included as a common gene. In a similar manner, 825 specific  
714 SOX2-bound genes that also significantly expressed mRNAs were identified in the variant  
715 subtype of the SBC3 cell line. Hippo pathway-related genes and *REST* were included as  
716 common genes. (C) Results of the GO functional analysis. The top 10 enriched categories in  
717 biological processes in each of the classical and variant subgroups were shown. The distinct  
718 functions of SOX2 in each subgroup were suggested.

719

720 Fig. 2: (A) A WB analysis showed that the transfection of *ASCL1* in A549 ADC cells  
721 increased SOX2, INSM1 and WNT11 expression.  $\beta$ -ACTIN served as an internal control. (B)  
722 Tumor tissues by the xenotransplantation of mock A549 cells and *ASCL1*-transfected A549  
723 cells in immunodeficient mice. Using IHC, *ASCL1* transfection induced SOX2 protein  
724 expression in tumor cell nuclei. Representative images are shown. Scale bar = 200  $\mu$ m. (C)  
725 Changes in transcriptional regulation driven by SOX2 between *ASCL1*-transfected A549  
726 and A549 mock cells. ChIP- and RNA-seq combined data showed 35 specific SOX2-bound  
727 genes in *ASCL1*-transfected A549. *INSM1* was newly detected after the transfection of  
728 *ASCL1*. (D) An integrated genome viewer (IGV) snapshot showed SOX2 binding at the  
729 overlap region of the transcription starting site and ASCL1 binding near the site of the  
730 *INSM1* gene in SCLC cell lines. (E) The suppression of SOX2 by RNAi for ASCL1 was  
731 confirmed in H889 and SBC1 cells by a WB analysis (F) IHC images of surgically resected  
732 SCLC tissues for SOX2, ASCL1, and INSM1. These proteins were strongly expressed in  
733 tumor cell nuclei. Representative images are shown. Scale bar = 200  $\mu$ m. (G) Expression  
734 levels of *ASCL1*, *INSM1*, and *SOX2* in the RNA-seq dataset of SCLC tissues. The GSE60052  
735 (n=79) dataset (Jiang *et al.*, 2016) was analyzed. NT, non-treated; si, small interfering.

736

737 Fig. 3: (A) *SOX2* affects *INSM1*, *WNT11*, and *CDH1* expression in SCLC cell lines. The  
738 suppression of *INSM1*, *WNT11*, and *CDH1* was observed in the classical subtype of the  
739 SCLC cell lines, H69, H889, and SBC1s with RNAi for *SOX2*. *SOX2* was also involved in the  
740 expression of *NOTCH1*, *MYC*, *TCF4*, *Trp53*, and *RBL1* in *ASCL1*-TF A549 cells. (B) Cell  
741 counting assays with SCLC cell lines. The cell growth curve is shown. The suppression of  
742 cell proliferation was observed in H69, H889, and SBC1 cells with RNAi against *SOX2*. The  
743 analysis was performed in triplicate. Data are shown as the mean  $\pm$ SD. Asterisks indicate a  
744 significant difference. \*,  $p < 0.05$ .

745

746 Fig. 4: *SOX2* knockdown in the variant subtype of SCLC cell lines, SBC3 and H69AR  
747 cells, using RNAi. *SOX2* mRNA expression significantly decreased, whereas tumor  
748 proliferative capacity did not after the knockdown of *SOX2* in SBC3 and H69AR cells. *YAP1*,  
749 *TEAD1*, or *VIMENTIN* mRNA expression decreased in *SOX2*-knockout SBC3 and H69AR  
750 cells. *ASCL1*, *INSM1*, and *WNT11* mRNA expression did not change in these cell lines. The  
751 analysis was performed in triplicate. Data are shown as the mean  $\pm$ SD. Asterisks indicate a  
752 significant difference. \*,  $p < 0.05$ .

753

754 Fig. 5: A SCLC precursor lesion in the *Trp53* (-); *CCSPrtTA*; *tetOCre*; *Rb1* (*fl/fl*); *Hes1*  
755 (*fl/fl*) mouse treated with doxycycline for 6 weeks. Serial sections stained with hematoxylin  
756 and eosin (HE) and IHC for *Ascl1*, *Sox2*, and *Insm1*. Scale bar = 50  $\mu$ m.

757

758 Fig. 6: Distinct roles for SOX2 in classical and variant subtypes of SCLC were  
759 summarized. ASCL1 and SOX2 cooperatively regulate INSM1 and WNT11 expression and  
760 SOX2 affects not only tumor cell proliferation, but also EMT modulation or NE  
761 differentiation in the classical subtype. On the other hand, SOX2 affects distinct cell  
762 signaling, such as the Hippo pathway, and modulates EMT in the variant subtype. SOX2  
763 affects tumor cell survival slightly more in the classical subtype than in the variant subtype  
764 of SCLC.

765

766 Supplementary Fig. S1: IHC images of surgically resected non-SCLC tissues for SOX2,  
767 and ASCL1. SOX2 was expressed in tumor cell nuclei. Representative images are shown.  
768 Scale bar = 200  $\mu$ m.

769

770 Supplementary Fig. S2: SOX2 affects ASCL1 expression in SCLC cell lines. The  
771 suppression of *ASCL1* was observed in the classical subtype of SCLC cell lines, H69, H889,

772 and SBC1, with RNAi for *SOX2* by qRT-PCR. Hippo pathway-related mRNA, *YAP1* and  
773 *TEAD1*, did not show significant changes after the knockdown of *SOX2* in these cells. The  
774 analysis was performed in triplicate. Data are shown as the mean  $\pm$ SD. Asterisks indicate a  
775 significant difference. \*,  $p < 0.05$ .

776

777           Supplementary Fig. S3: *SOX2* knockout in SBC3 and H69AR cells using the  
778 CRISPR/Cas9 system. SOX2 protein expression was completely diminished (A), whereas  
779 tumor proliferative capacity was not after the knockout of *SOX2* in SBC3 and H69AR cells  
780 (B). *YAP1*, *TEAD1*, or *VIMENTIN* mRNA expression decreased in SOX2-knockout SBC3 and  
781 H69AR cells (C).

782

783 **The paper explained**

784 PROBLEM

785           Small cell lung cancer (SCLC) is an aggressive neuroendocrine (NE) malignancy with  
786 few therapeutic options. *SOX2* is an oncogene, the amplification of which has been reported  
787 in human SCLC. However, the role of SOX2 remains unclear and strategies to selectively  
788 target SCLC cells have not been established.

789

790 RESULTS

791 A chromatin immunoprecipitation sequencing analysis identified distinct putative  
792 target genes of SOX2 between the classical and variant subtypes of SCLC cell lines. ASCL1,  
793 a lineage-specific transcriptional factor, is involved in NE differentiation and tumorigenesis,  
794 and recruited SOX2 to the lineage-specific gene, *INSM1*, in the classical subtype of SCLC.  
795 *SOX2* suppression using RNAi resulted in significant reductions in tumor cell proliferative  
796 capacity in the classical subtype. On the other hand, SOX2 binds distinct genes, such as  
797 those in the Hippo signaling pathway, and the knockdown of *SOX2* was insufficient to  
798 inhibit tumor cell growth in the variant subtype of SCLC. SOX2 appears to potently  
799 modulate epithelial-to-mesenchymal transition via the Wnt or Hippo signaling pathways  
800 and affect tumor cell invasive capacity in each cell in a context-dependent manner.

801

802 IMPACT

803 The present results provide insights into the functional underpinnings of small cell  
804 lung carcinogenesis and promote our understanding of SCLC phenotypic changes. The  
805 functional discrepancy in SOX2 between the classical and variant subtypes of SCLC may  
806 have an impact on appropriate therapeutic approaches and suggests that the ASCL1-SOX2  
807 axis is a promising therapeutic target or biomarker to identify SCLC patients that may

808 benefit from a SOX2-directed therapeutic approach in future clinical trials.

Figure 1

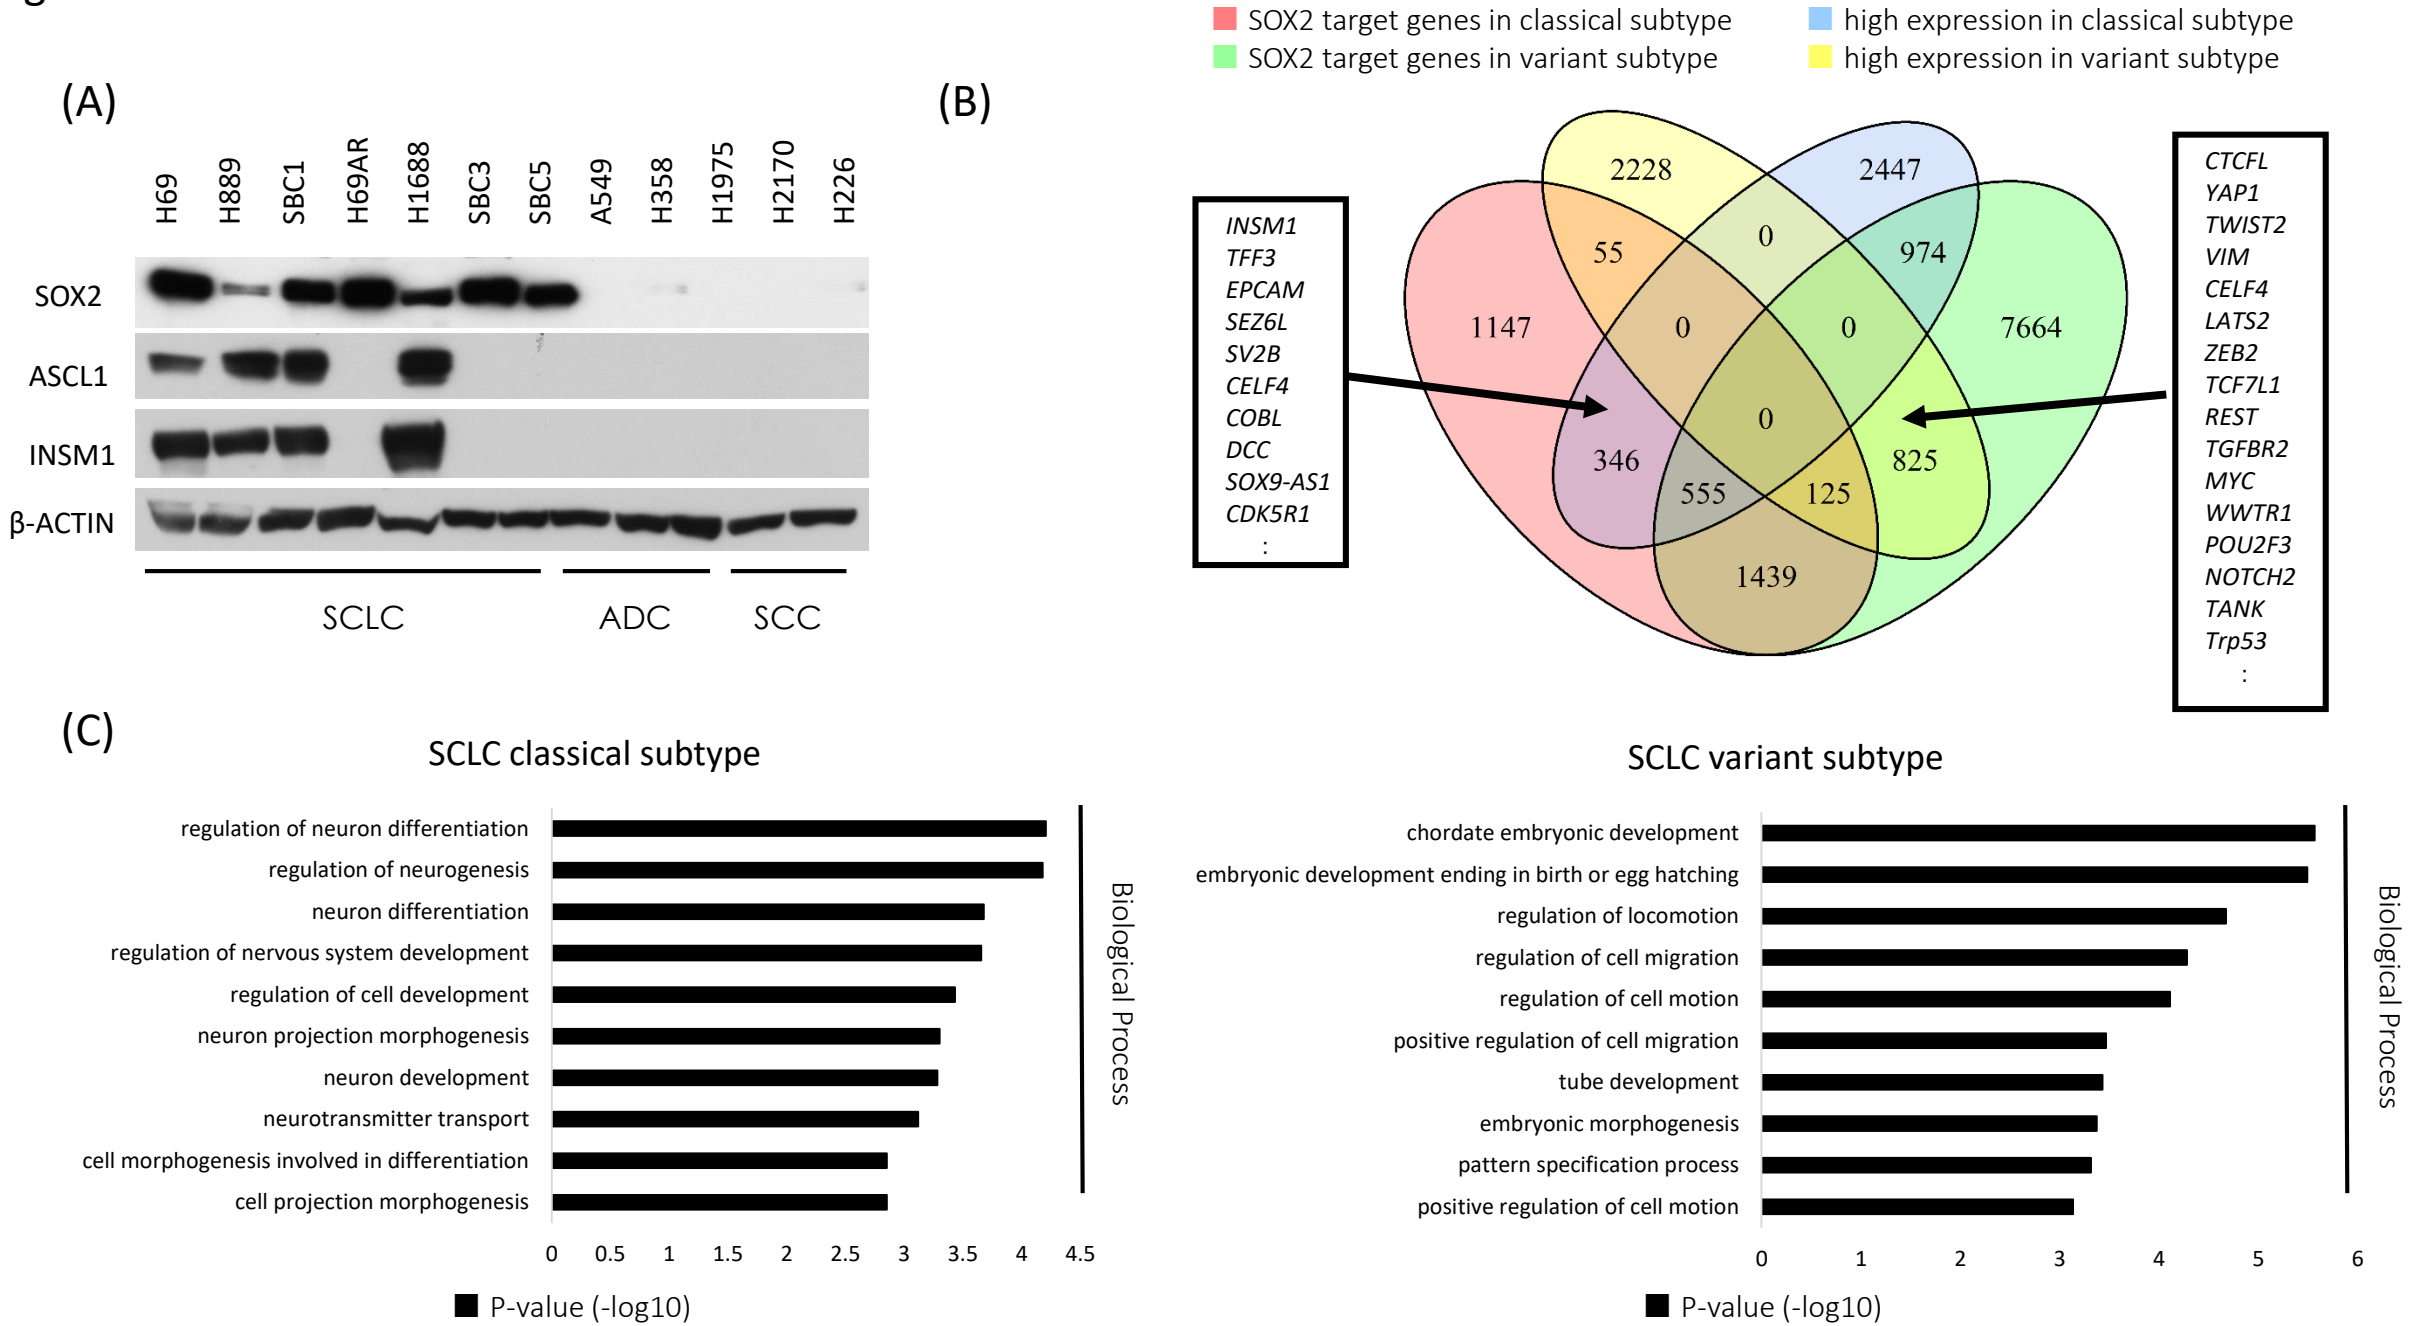



Figure 2

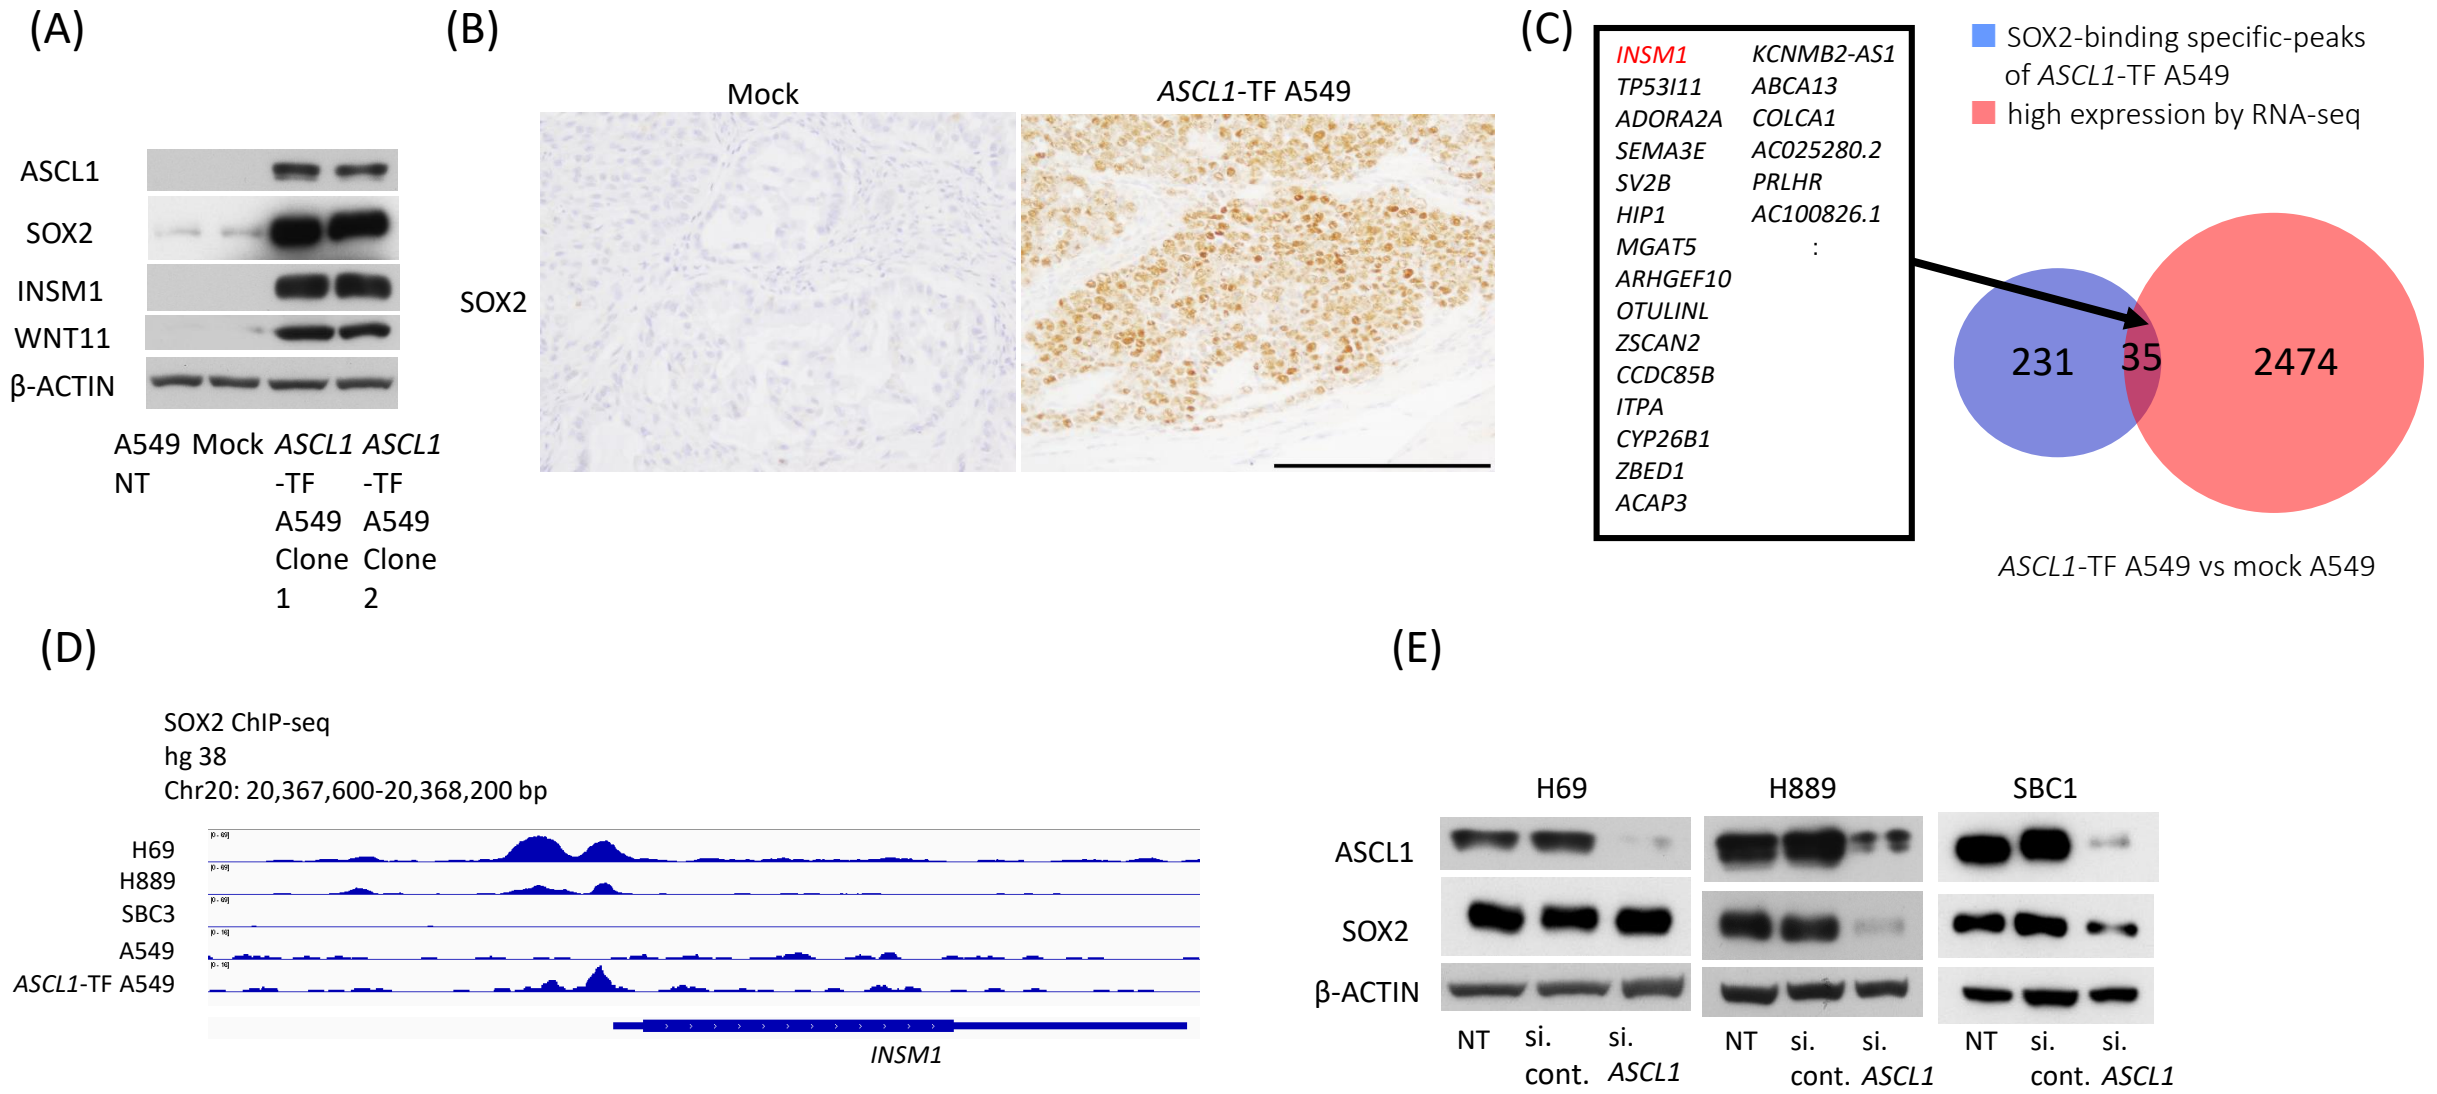



Figure 3

(A)

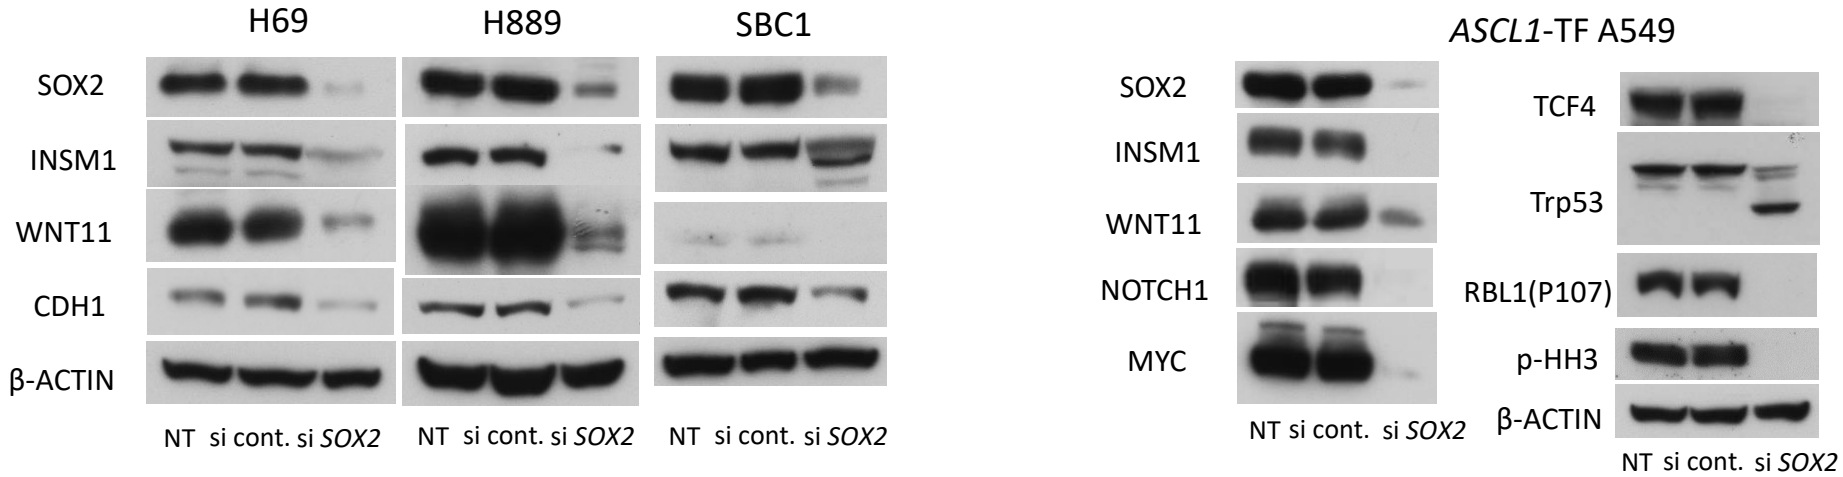

(B)

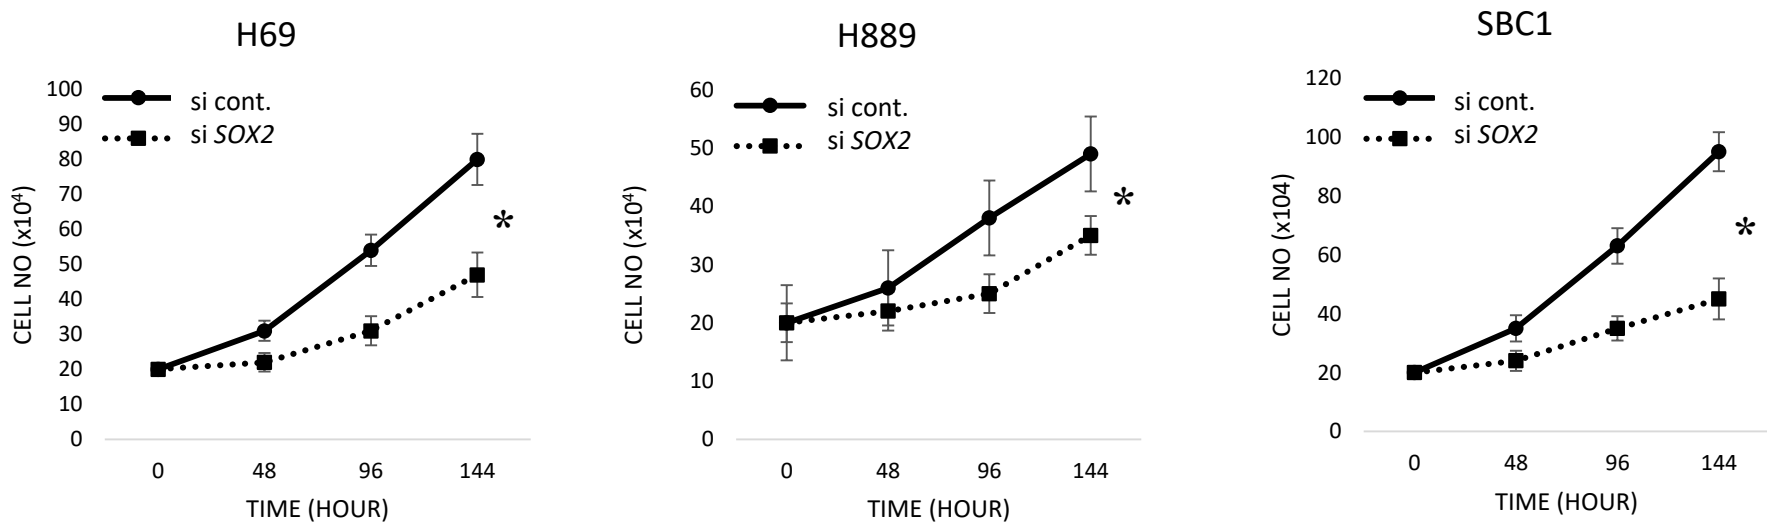

Figure 4

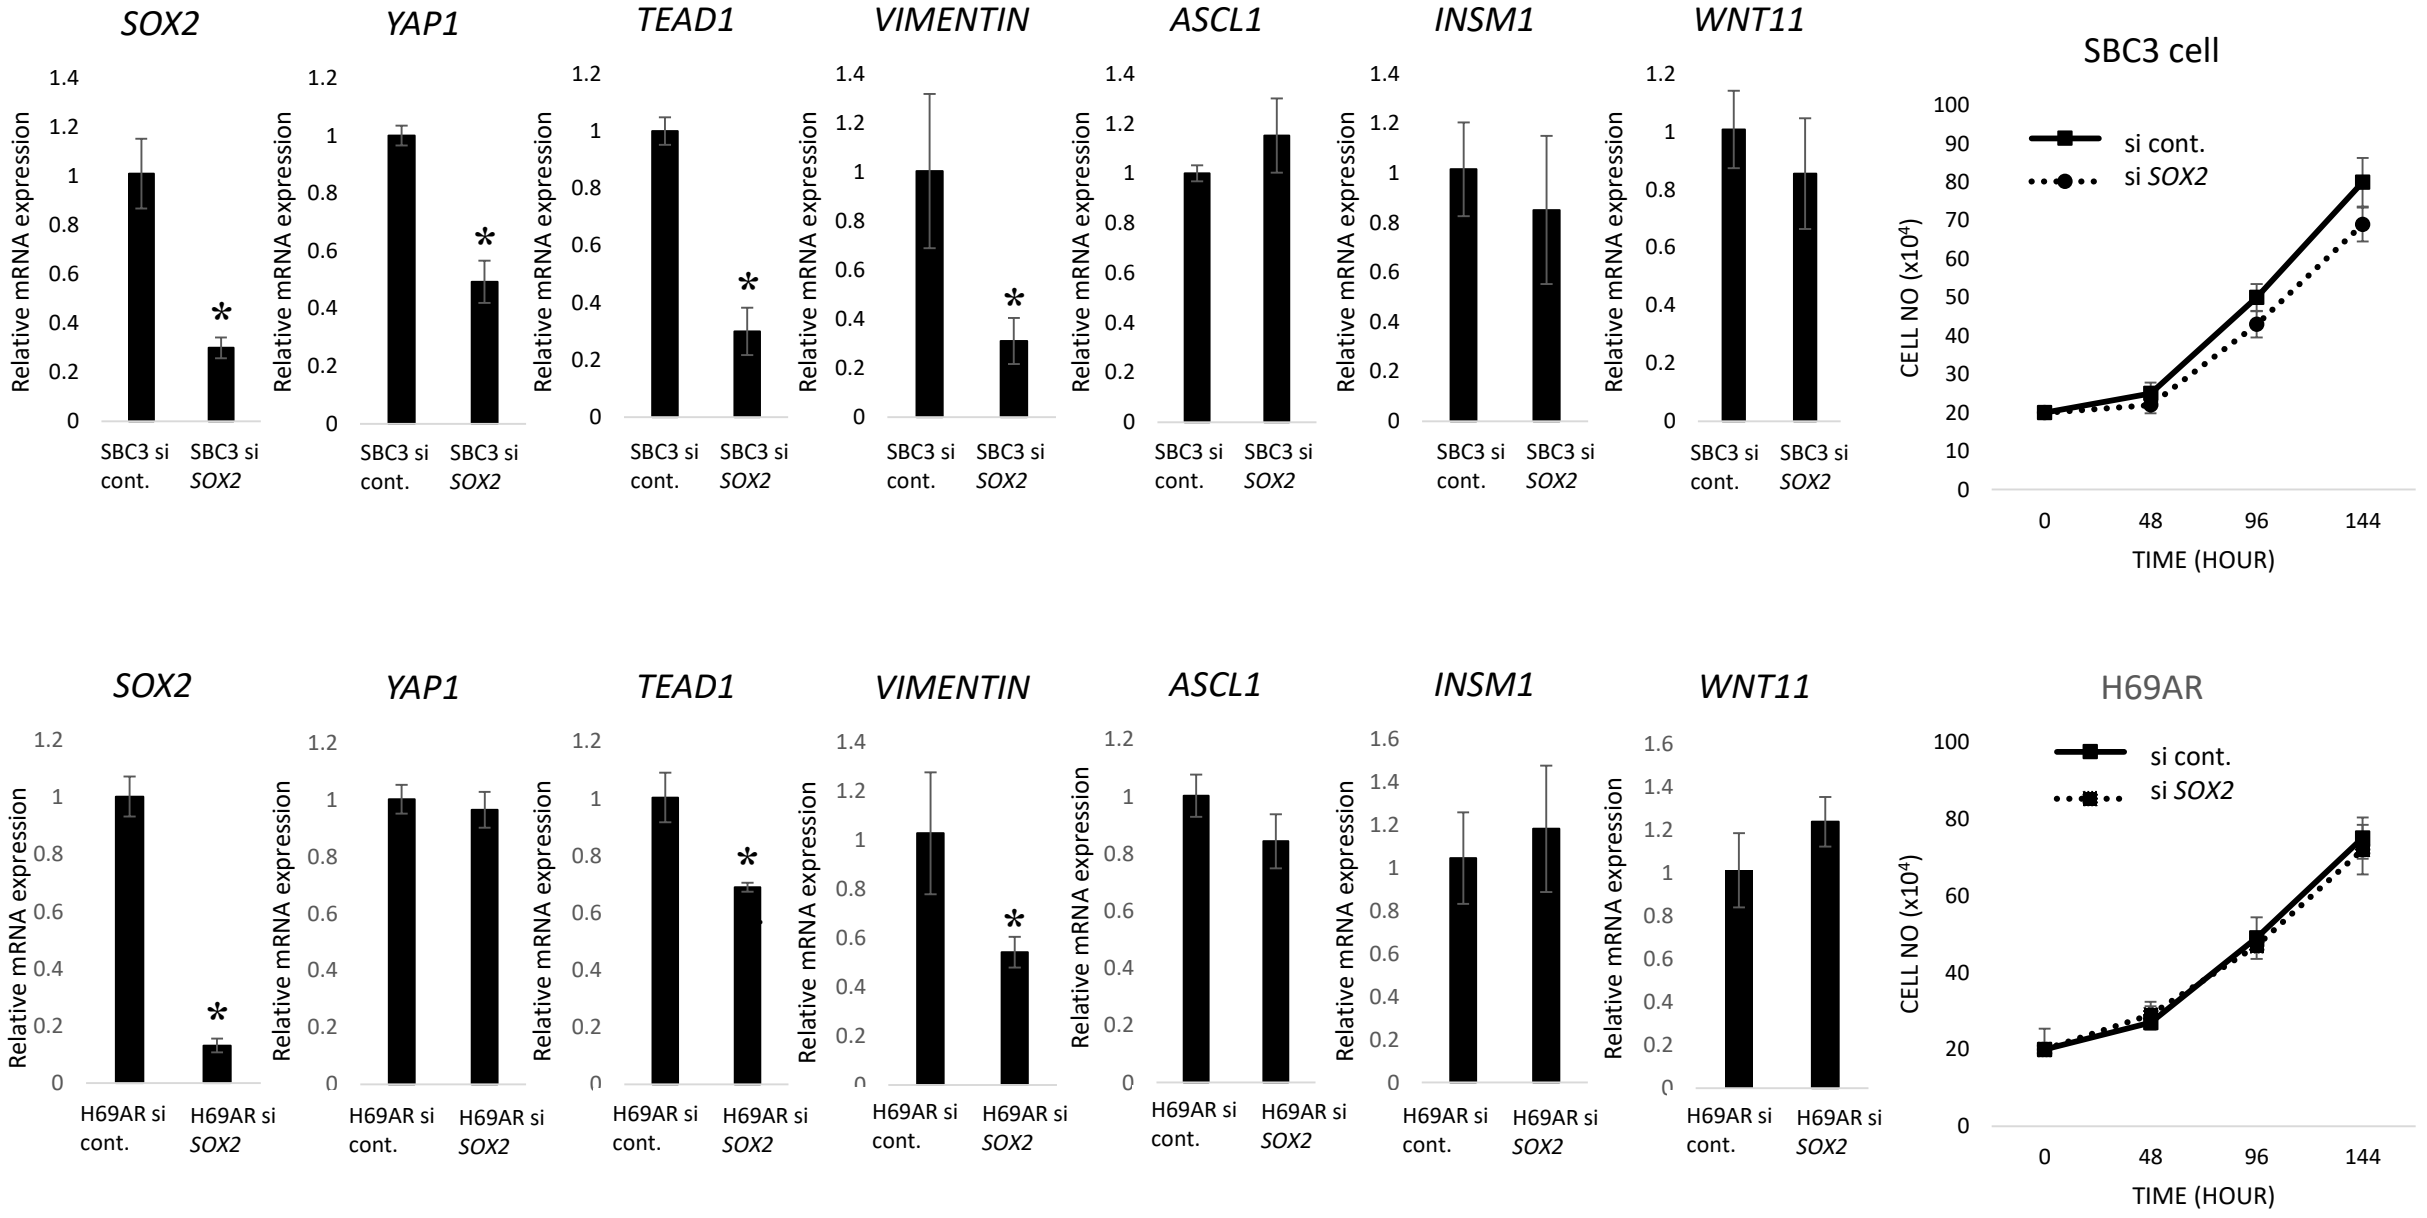

Figure 5

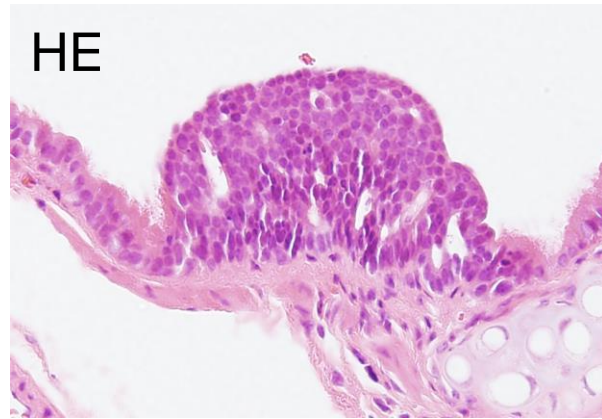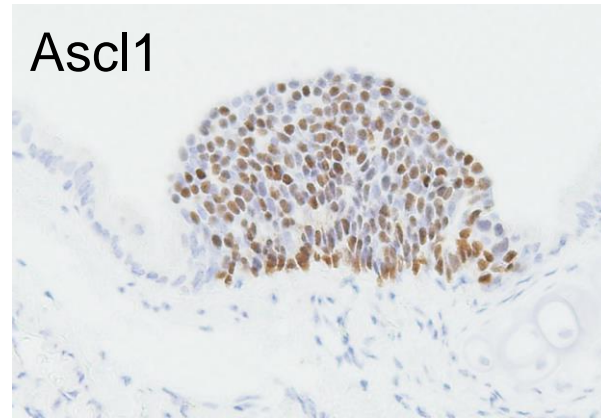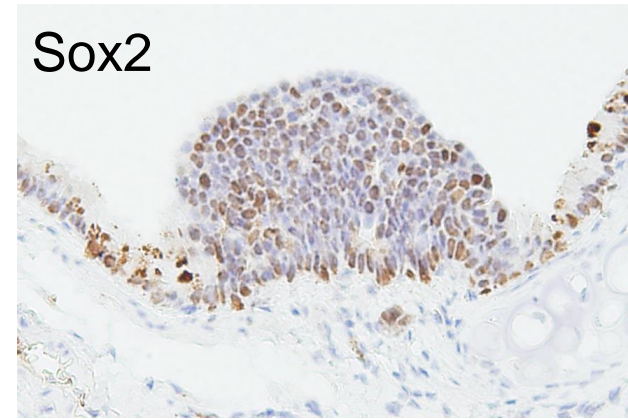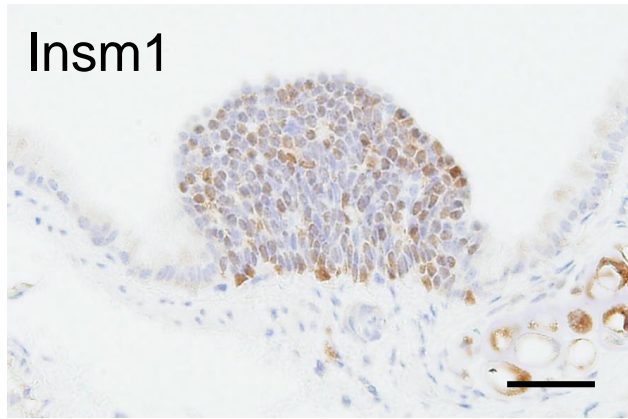

Figure 6

Classical subtype SCLC cells

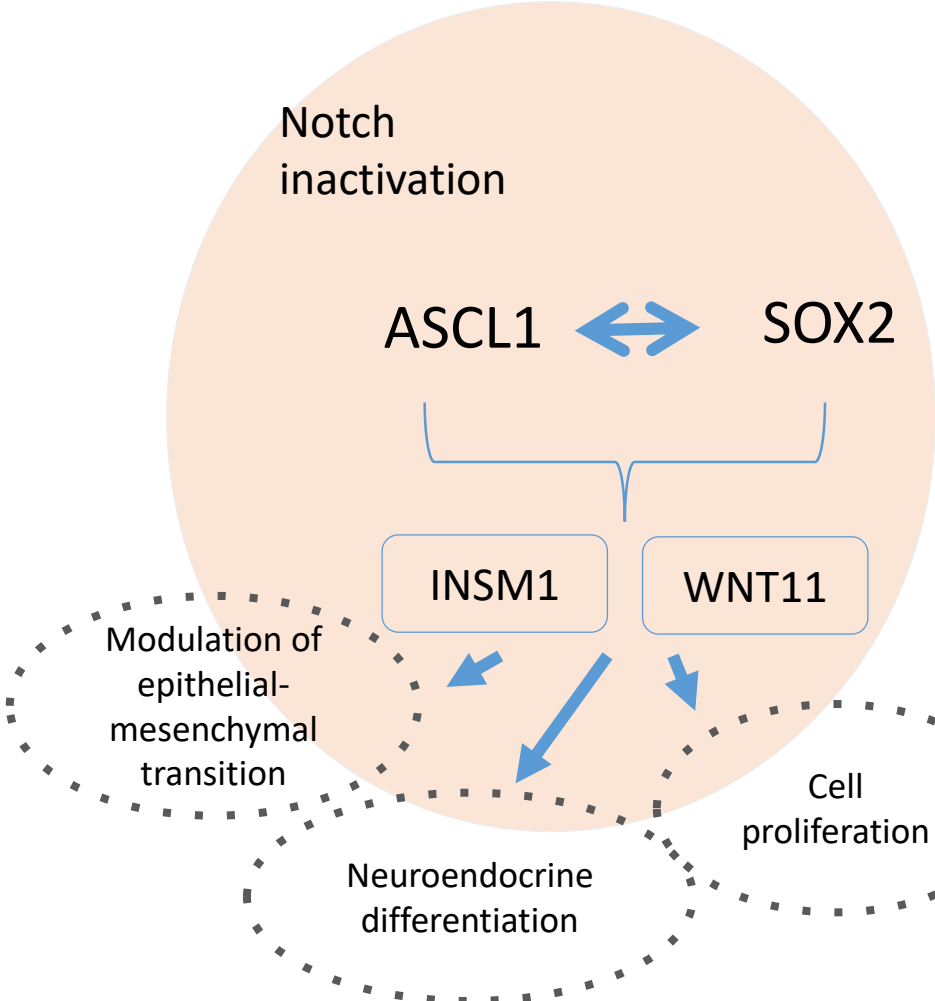

Variant subtype SCLC cells

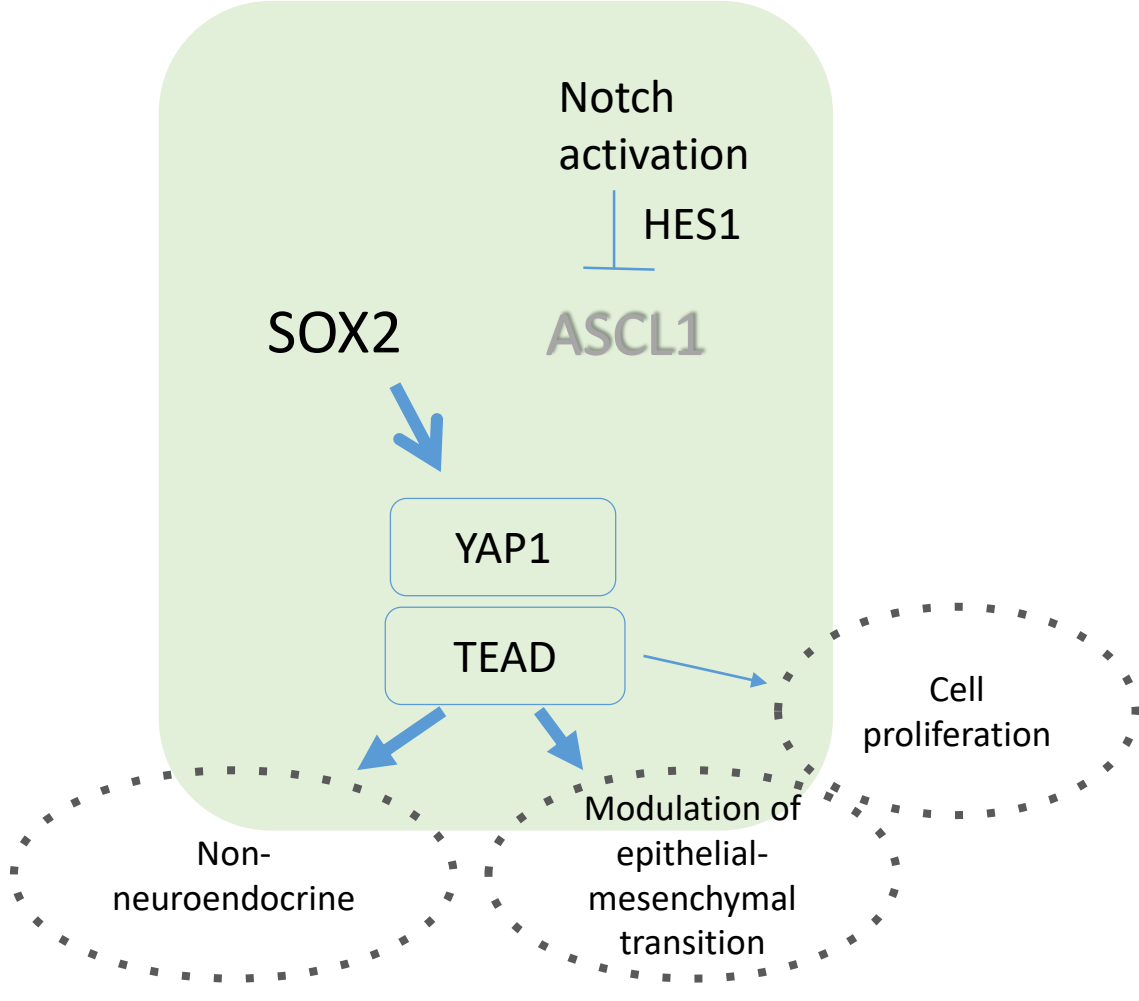



Supplementary Figure S1

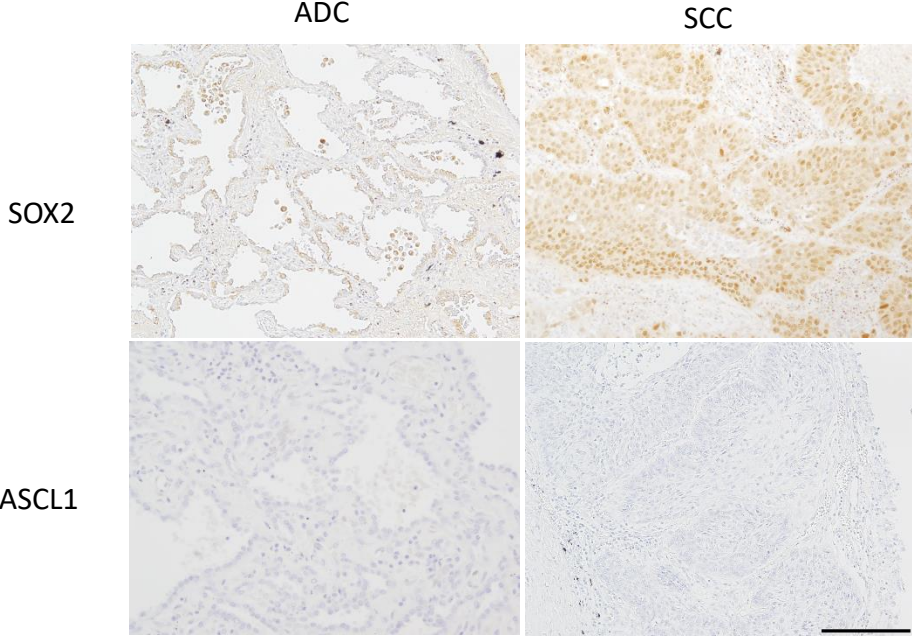

# Supplementary Figure S2

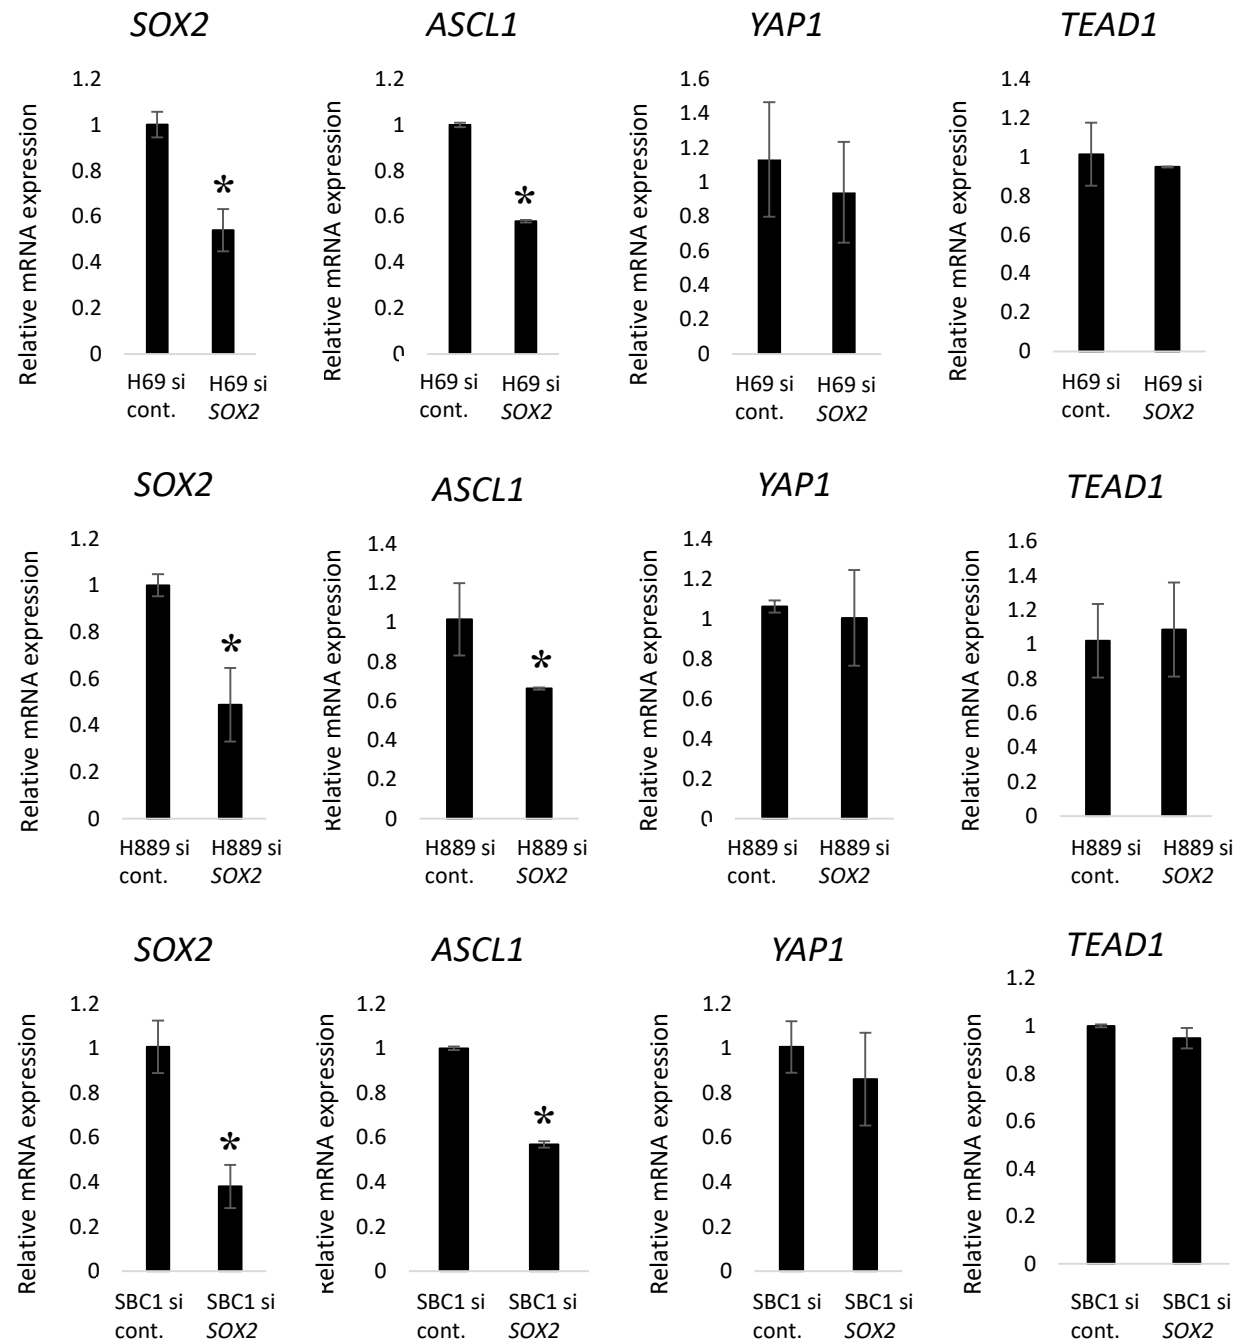



# Supplementary Figure S3

(A)

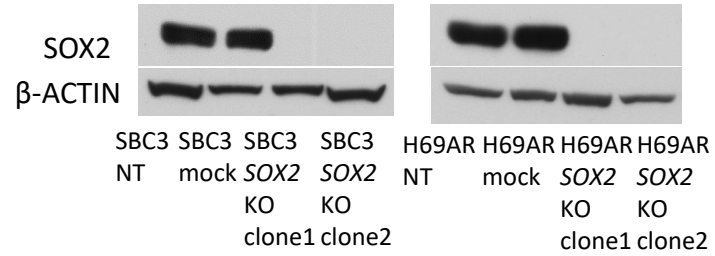

(C)

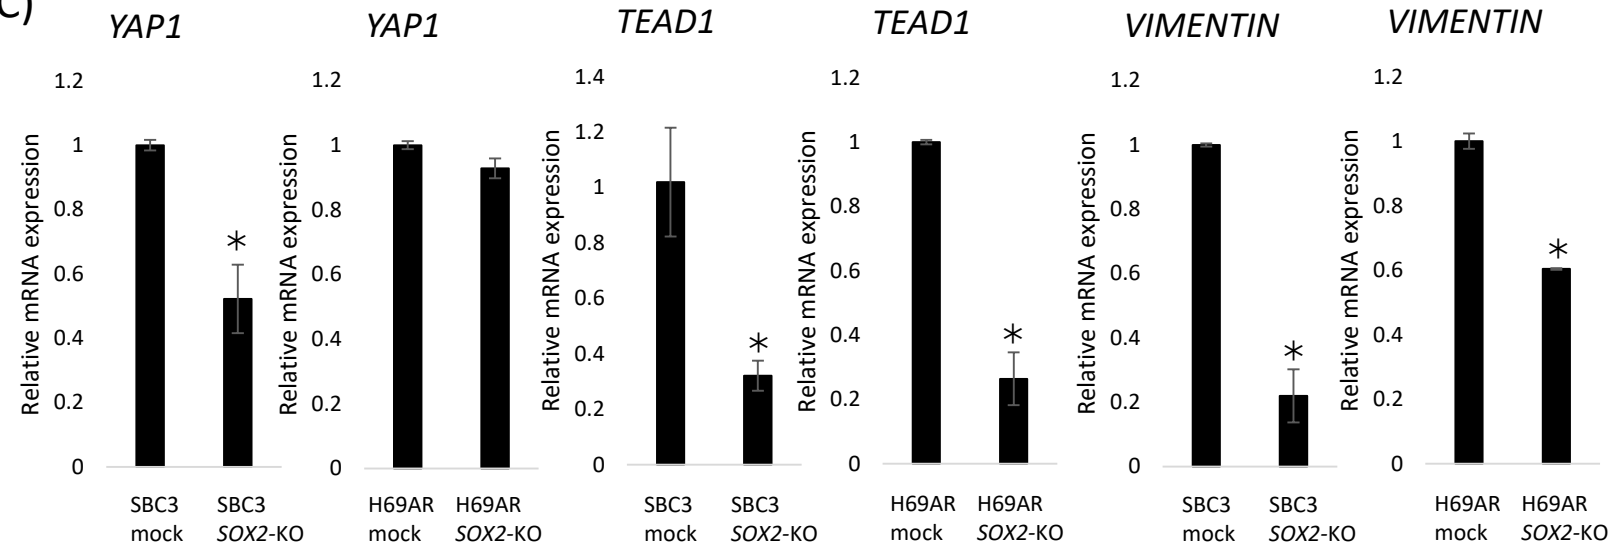

(B)

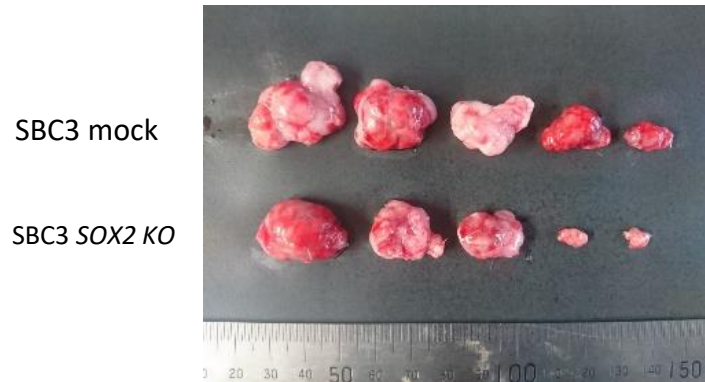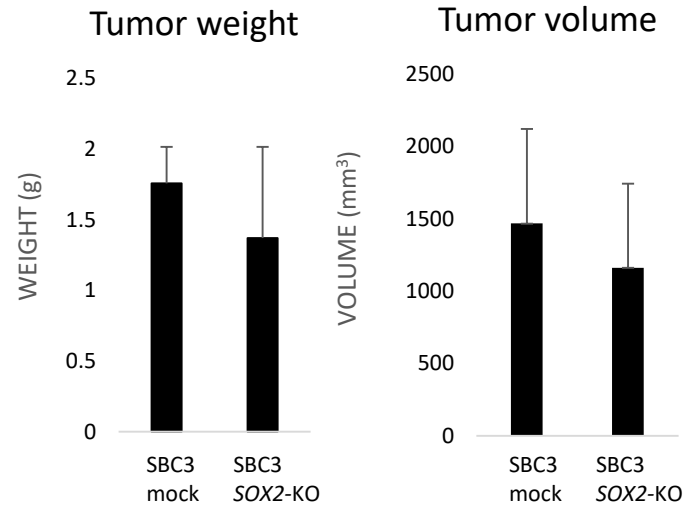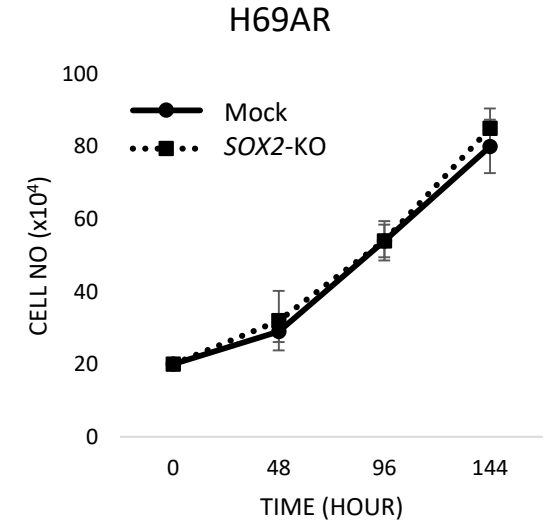

**Table 1** Result of Immunohistochemical Staining of Human Lung cancer

|                  | SCLC          |               |               | ADC           |
|------------------|---------------|---------------|---------------|---------------|
|                  | SOX2          | ASCL1         | INSM1         | SOX2          |
| score            |               |               |               |               |
| 0, negative      | 3/30 (10.0%)  | 9/30 (30.0%)  | 4/30 (13.3%)  | 6/20 (30.02%) |
| 1, weak positive | 6/30 (20.0%)  | 3/30 (10.0%)  | 1/30 (3.3%)   | 7/20 (30.0%)  |
| 2, positive      | 21/30 (70.0%) | 18/30 (60.0%) | 25/30 (83.3%) | 7/20 (35.0%)  |

SCLC tissues highly express SOX2, ASCL1, and INSM1. Immunohistochemical staining for SC specimens that had been surgically resected. Immunohistochemical staining for SOX2 and specimens. SCLC, small cell lung carcinoma; ADC, adenocarcinoma; SCC, squamous cell car

| SCC           |               |               |
|---------------|---------------|---------------|
| ASCL1         | SOX2          | ASCL1         |
| 17/20 (85.0%) | 4/20 (20.0%)  | 16/20 (80.0%) |
| 3/20 (15.0%)  | 5/17 (25.0%)  | 4/20 (20.0%)  |
| 0/20 (0%)     | 11/20 (55.0%) | 0/20 (0%)     |

SOX2, ASCL1, and INSM1 was performed in 30 SCLC  
ASCL1 was also performed in 20 ADC and 20 SCC  
cinoma

**Table 2** Antibodies used for IHC and WB analysis

| Primary antibody        | Manufacturer (location)              | WB      | IHC        |
|-------------------------|--------------------------------------|---------|------------|
| Sox2 (AB5603)           | Millipore (Billerica, MA)            | 1:1000  | 1:100      |
| Sox2 (E-4)              | Santa Cruz Biotechnology             |         | 1:100<br>0 |
| ASH1 (AB15582)          | Millipore (Billerica, MA)            |         | 1:100      |
| MASH1 (ab213151)        | abcam (Cambridge, UK)                |         | 1:100<br>0 |
| Ascl1 (556604)          | BD Biosciences (San Jose, CA)        | 1:500   |            |
| Wnt11 (107-10576)       | RayBiotech (Norcross, GA)            | 1:1000  |            |
| Insm1 (C-1)             | Santa Cruz Biotechnology             | 1:5000  |            |
| E-cadherin (610181)     | BD Biosciences                       | 1:1000  |            |
| Notch1 (D1E11)          | Cell Signaling                       | 1:1000  |            |
| c-Myc (D84C12)          | Cell Signaling                       | 1:1000  |            |
| TCF4 (D-4)              | Santa Cruz Biotechnology             | 1:1000  |            |
| p53 (DO-1)              | Santa Cruz Biotechnology             | 1:1000  |            |
| p107 (C-18)             | Santa Cruz Biotechnology             | 1:1000  |            |
| p-Histone H3 (Ser10)    | Millipore (Billerica, MA)            | 1:500   |            |
| $\beta$ -actin (A-5441) | Sigma Aldrich (Oakville, ON, Canada) | 1:10000 |            |

Manufacturers, quantities, and working dilutions are indicated. Ascl1, achaete-scute complex homolog-like 1; Wnt11, Wnt family member 11; Insm1, insulinoma-associated protein 1; TCF4, transcription factor 4; IHC, immunohistochemistry; WB, Western blot.

**Table 3** List of primers used in PCR

| Target   | Sequence                       | Product size (bp) |
|----------|--------------------------------|-------------------|
| SOX2     | F: 5 -AACCCCAAGATGCACAACCTC-3' | 152               |
|          | R: 5 -CGGGGCCGGTATTTATAATC-3'  |                   |
| ASCL1    | F: 5-CGGCCAACAAGAAGATGAGT-3'   | 169               |
|          | R: 5-GCCATGGAGTTCAAGTCGTT-3'   |                   |
| INSM1    | F: 5-CAGTGTGCGGAGAGTCGTT-3'    | 166               |
|          | R: 5-ACCTGTCTGTTTTCGGATGG-3'   |                   |
| WNT11    | F: 5-TGACCTCAAGACCCGATACC-3'   | 189               |
|          | R: 5-GCTTCCGTTGGATGTCTTGT-3'   |                   |
| YAP1     | F: 5 -GCAGTTGGGAGCTGTTTCTC -3' | 203               |
|          | R: 5 -GCCATGTTGTTGTCTGATCG -3' |                   |
| TEAD1    | F: 5 -TCAGCTTTTCTCGAGCAGCA-3'  | 555               |
|          | R: 5 -CACACAGGCCATGCAGAGTA-3'  |                   |
| VIMENTIN | F: 5 -GAGAACTTTGCCGTTGAAGC -3' | 170               |
|          | R: 5 -TCCAGCAGCTTCTGTAGGT -3'  |                   |
| GAPDH    | F: 5 -CAGCCTCAAGATCATCAGCA -3' | 106               |
|          | R: 5 -TGTGGTCATGAGTCCTTCCA -3' |                   |

SOX2, SRY-box 2; ASCL1, achaete-scute complex homolog-like 1; INSM1, insulinoma-associated protein 1; WNT11, Wnt family member 11; YAP1, Yes associated protein 1; TEAD1, TEA domain transcription factor 1; GAPDH, glyceraldehyde-3-phosphate dehydrogenase; F, forward; R, reverse.
